# Supplementary material
Source: Research Square preprint supplement (doi:10.21203/rs.3.rs-9884549/v1)
Supplement: Supplementary file 1 [file dc0331a5da8a095e8c726c1b.docx]

# Supplementary Figure S1. Study design and workflow


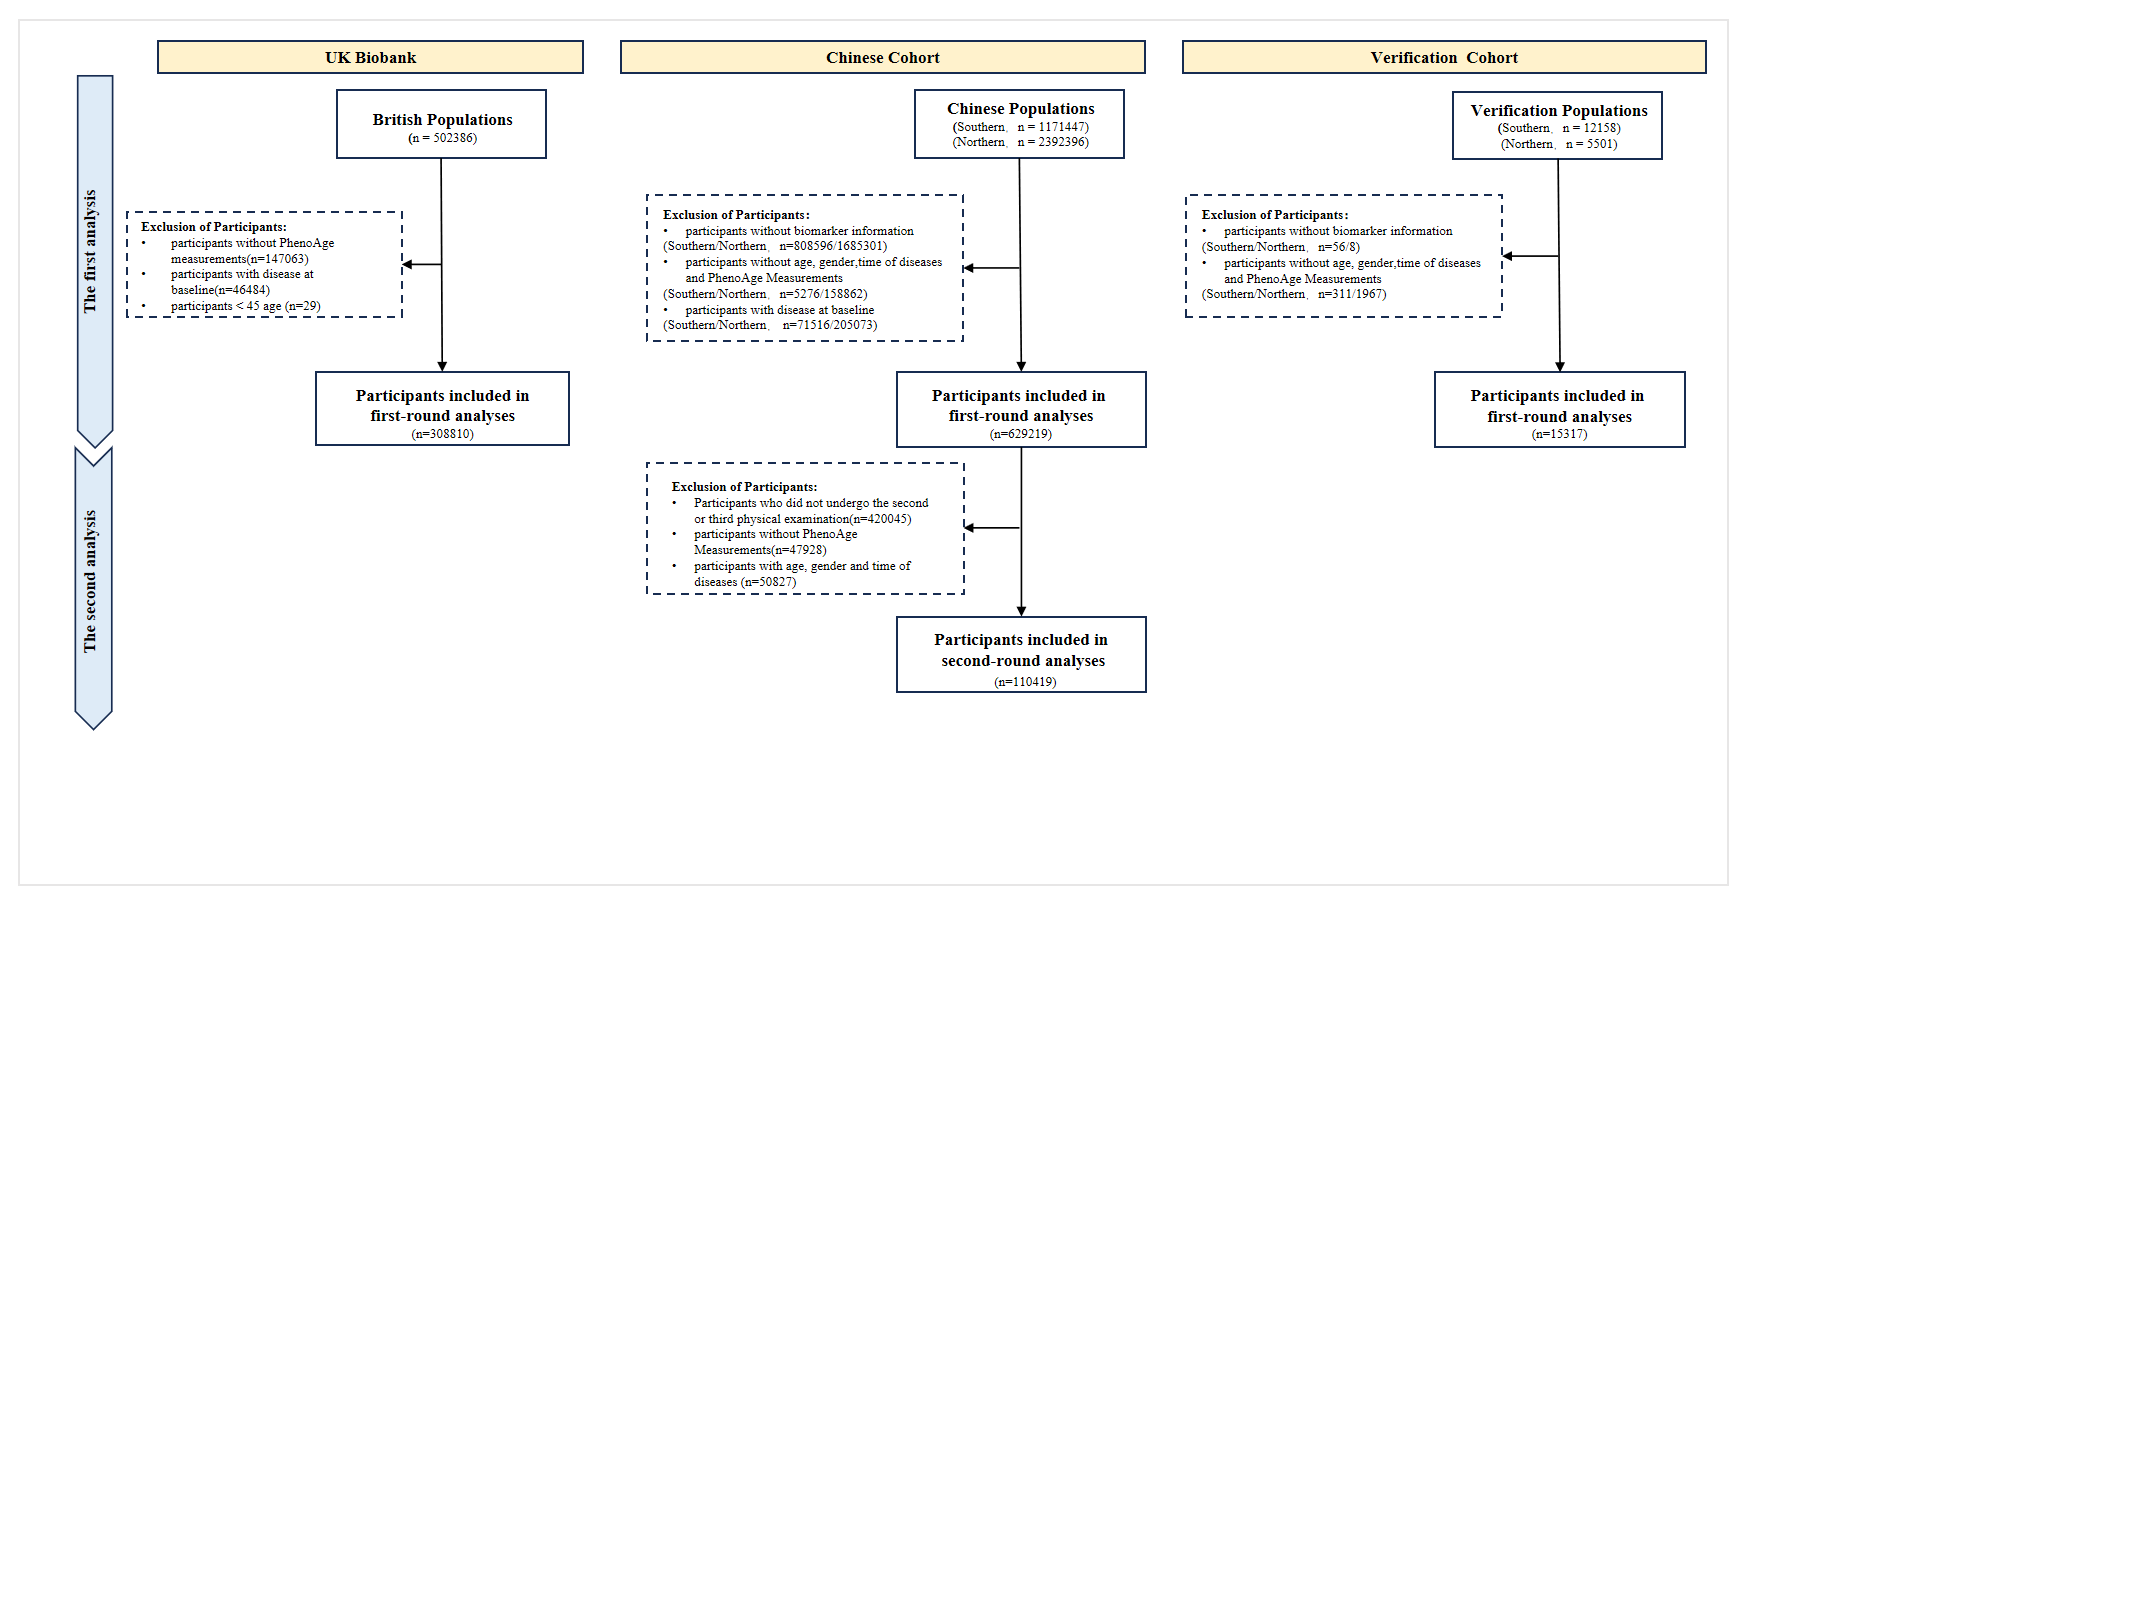


# Supplementary Figure S2. Kaplan-Meier survival curves


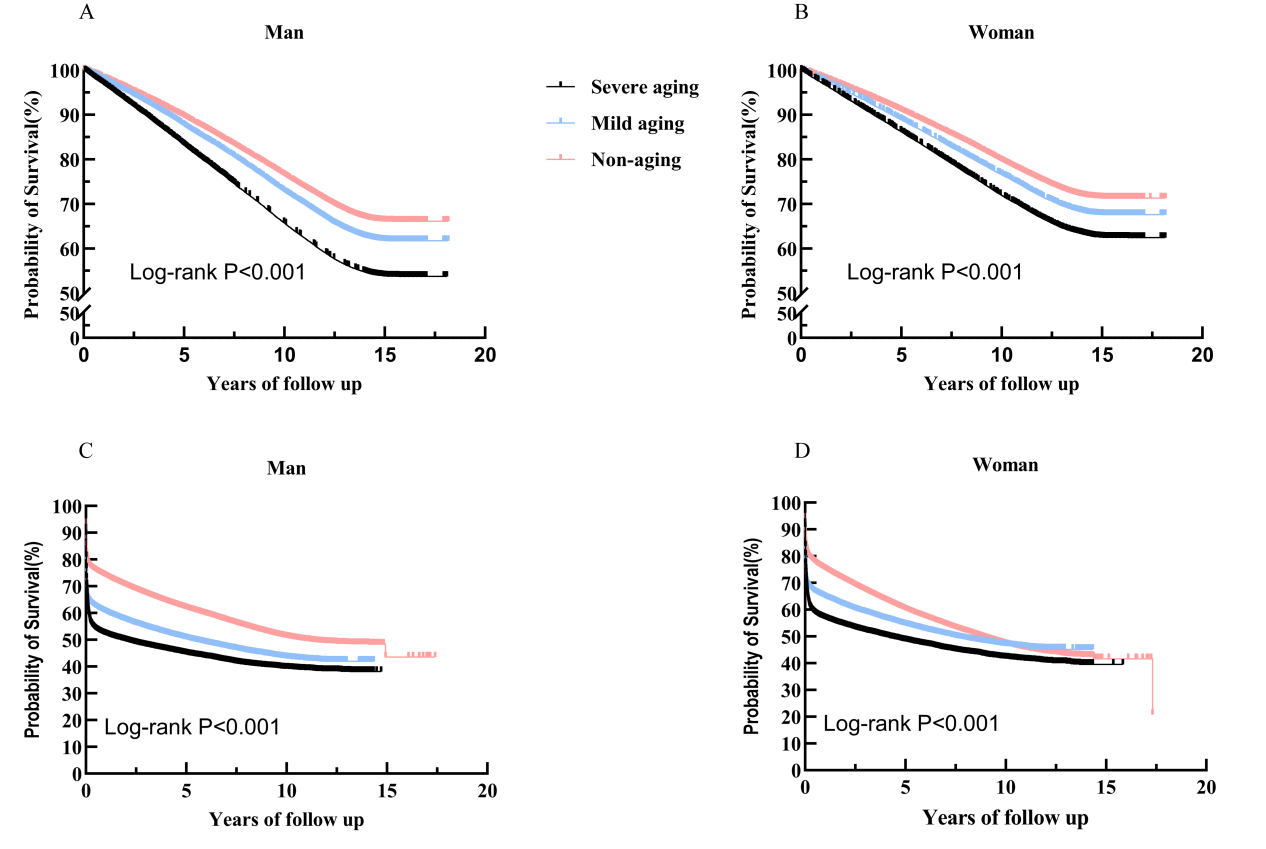


(A) Kaplan-Meier survival curves for PhenoAgeAccel groups of adults among people in UK Bioank.

(B) Kaplan-Meier survival curves for PhenoAgeAccel groups of adults among men in the UK Biobank.

(C) Kaplan-Meier survival curves for PhenoAgeAccel groups of adults among men in Chinese cohort.

(D) Kaplan-Meier survival curves for PhenoAgeAccel groups of adults among women in Chinese cohort.

# Supplementary Figure S3. Nonlinear association of PhenoAgeAccel with the risk of major diseases .


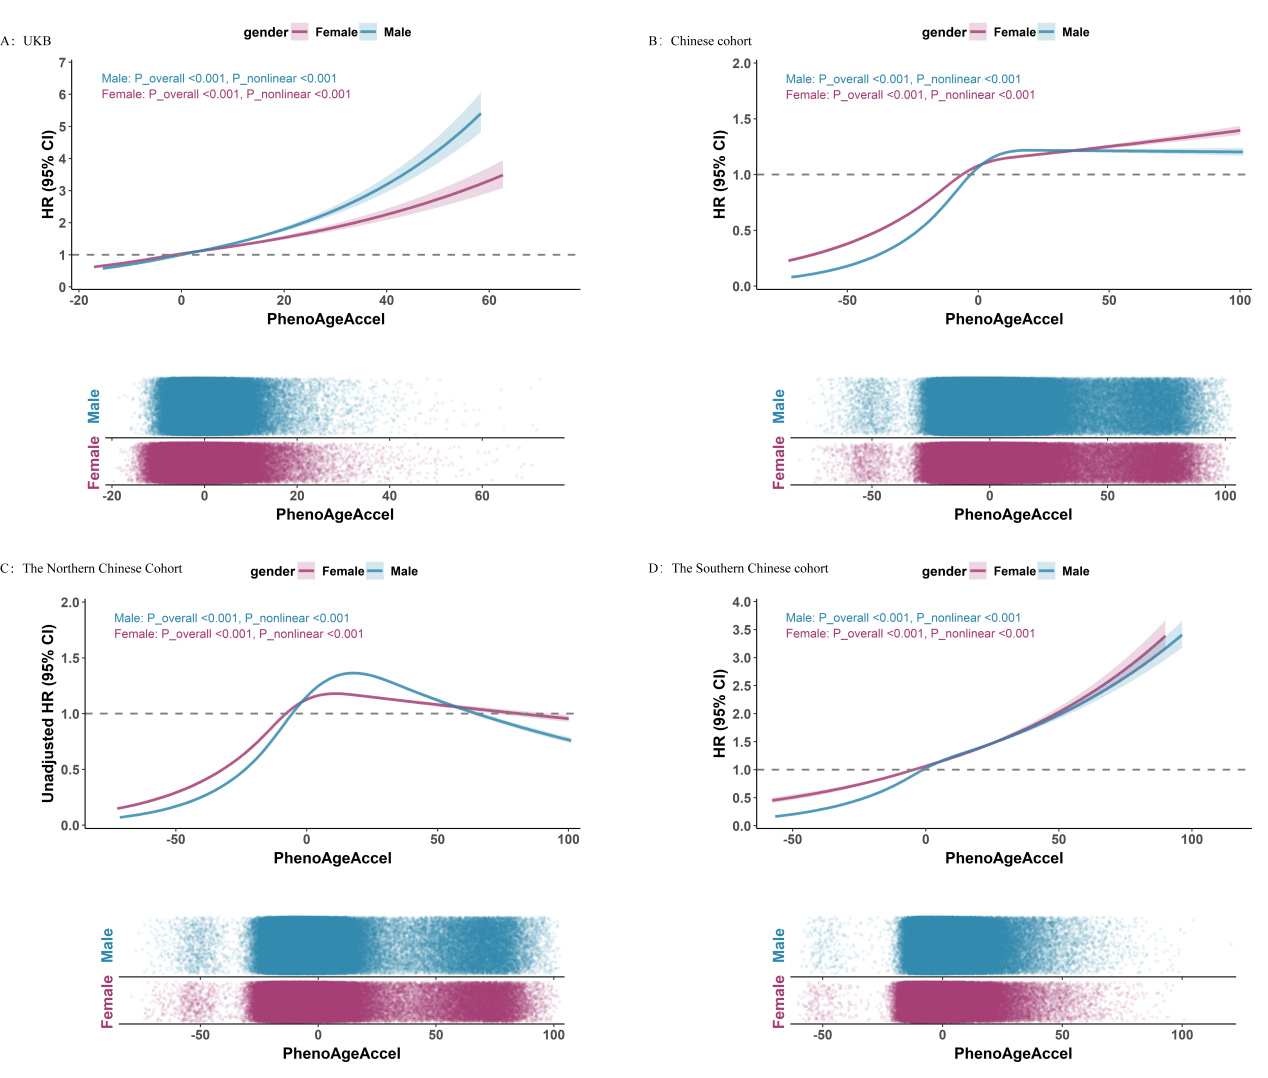


(A) Nonlinear association of PhenoAgeAccel with the risk of major diseases in UK Bioank.

(B) Nonlinear association of PhenoAgeAccel with the risk of major diseases in Chinese cohort.

(C) Nonlinear association of PhenoAgeAccel with the risk of major diseases in the Northern Chinese cohort.

(D) Nonlinear association of PhenoAgeAccel with the risk of major diseases in the Southern Chinese cohort.

HR: hazard ratio.

# Supplementary Figure S4. Trends in PhenoAge as a function of chronological age.


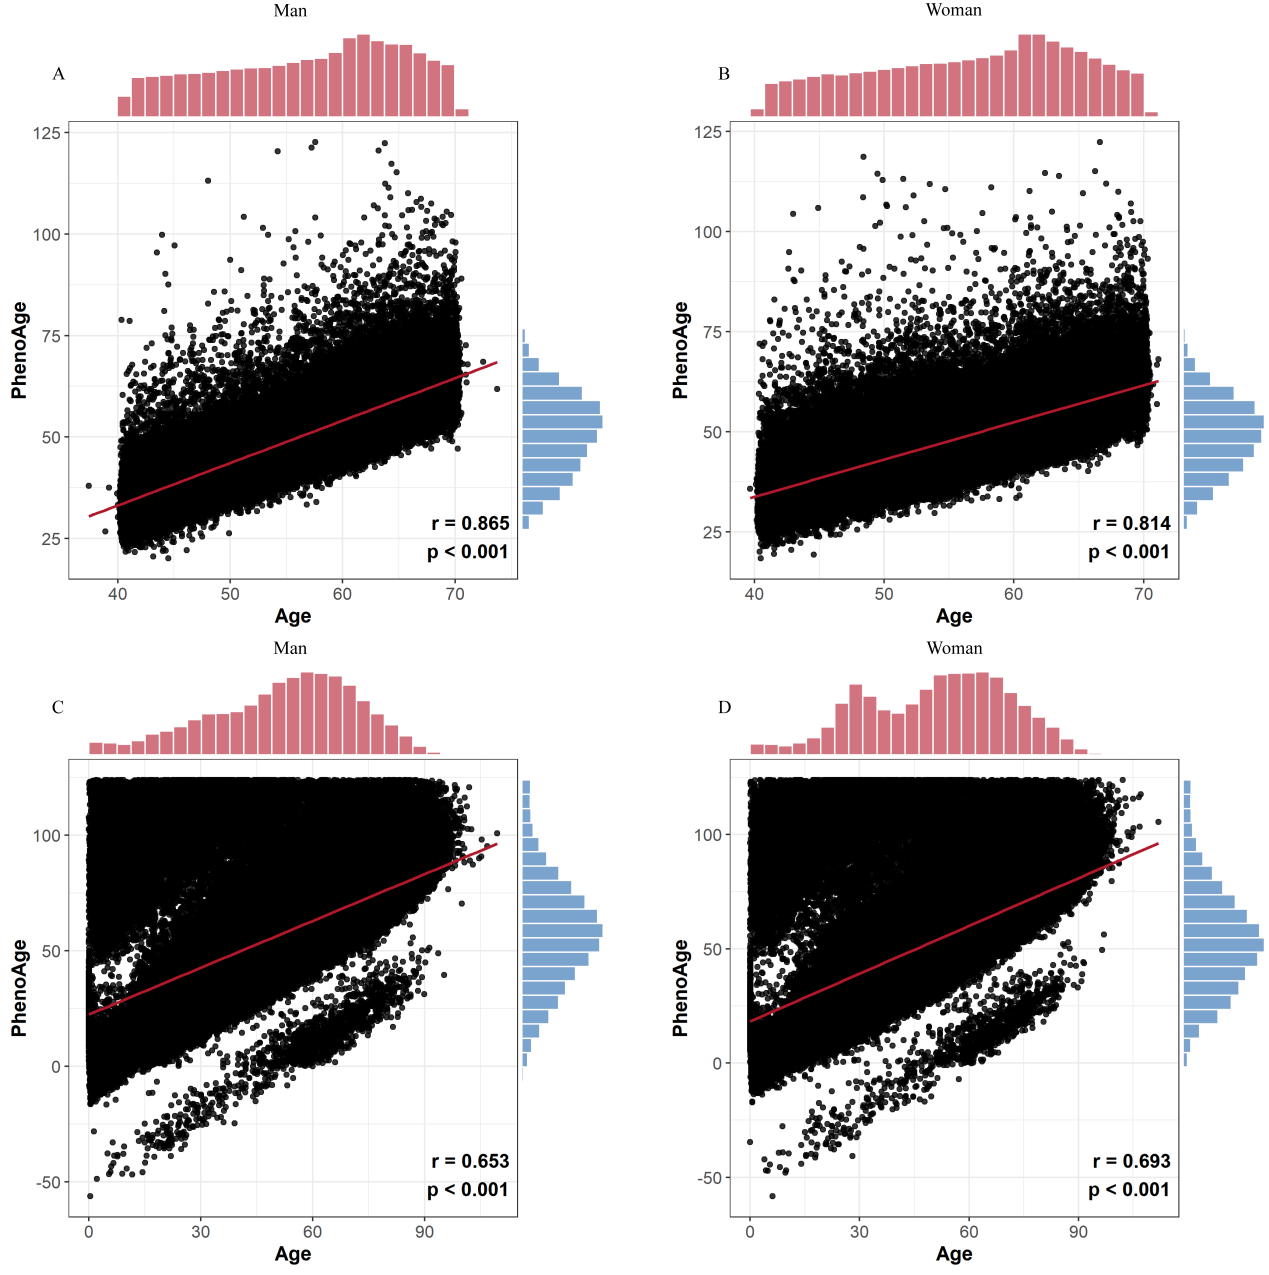


(A)Trends in PhenoAge as a function of chronological age of adults among men in UK Bioank.

(B) Trends in PhenoAge as a function of chronological age of adults among women in the UK Biobank.

(C) Trends in PhenoAge as a function of chronological age of adults among men in Chinese cohort.

(D) Trends in PhenoAge as a function of chronological age of adults among women in Chinese cohort.

The red line depicts the expected PhenoAge for each chronological age, with points above the line depicting people who were phenotypically older than expected, and points below the line depicting those who were phenotypically younger than expected.

# Supplementary Figure S5. Distribution of PhenoAgeAccel across different disease states.


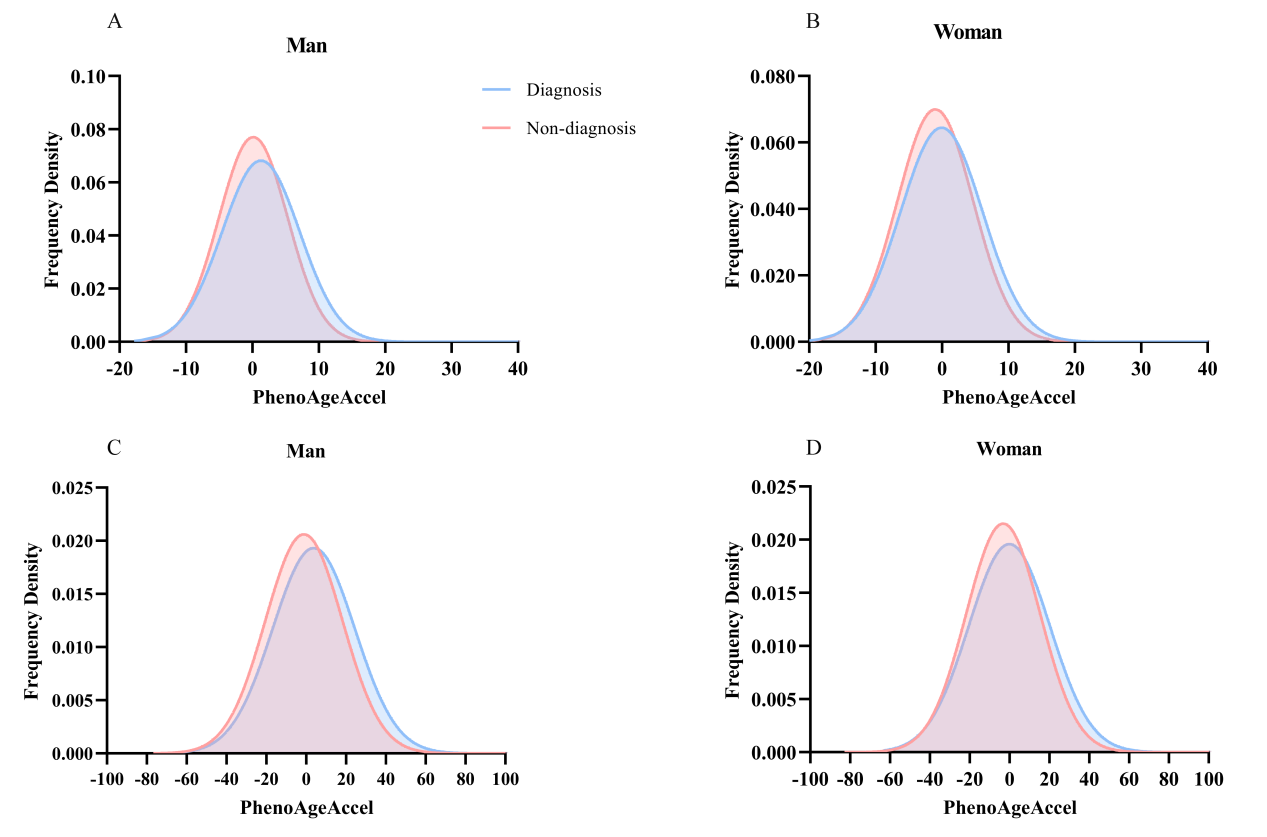


(A)Distribution of PhenoAgeAccel across different disease states of adults among men in UK Bioank.

(B) Distribution of PhenoAgeAccel across different disease states of adults among women in the UK Biobank.

(C) Distribution of PhenoAgeAccel across different disease states of adults among men in Chinese cohort.

(D) Distribution of PhenoAgeAccel across different disease states of adults among women in Chinese cohort.

# Supplementary Figure S6. The estimated increase in disease-free years based among the UKB population aged 45 to 100 after excluding participants with anxiety or/and depression


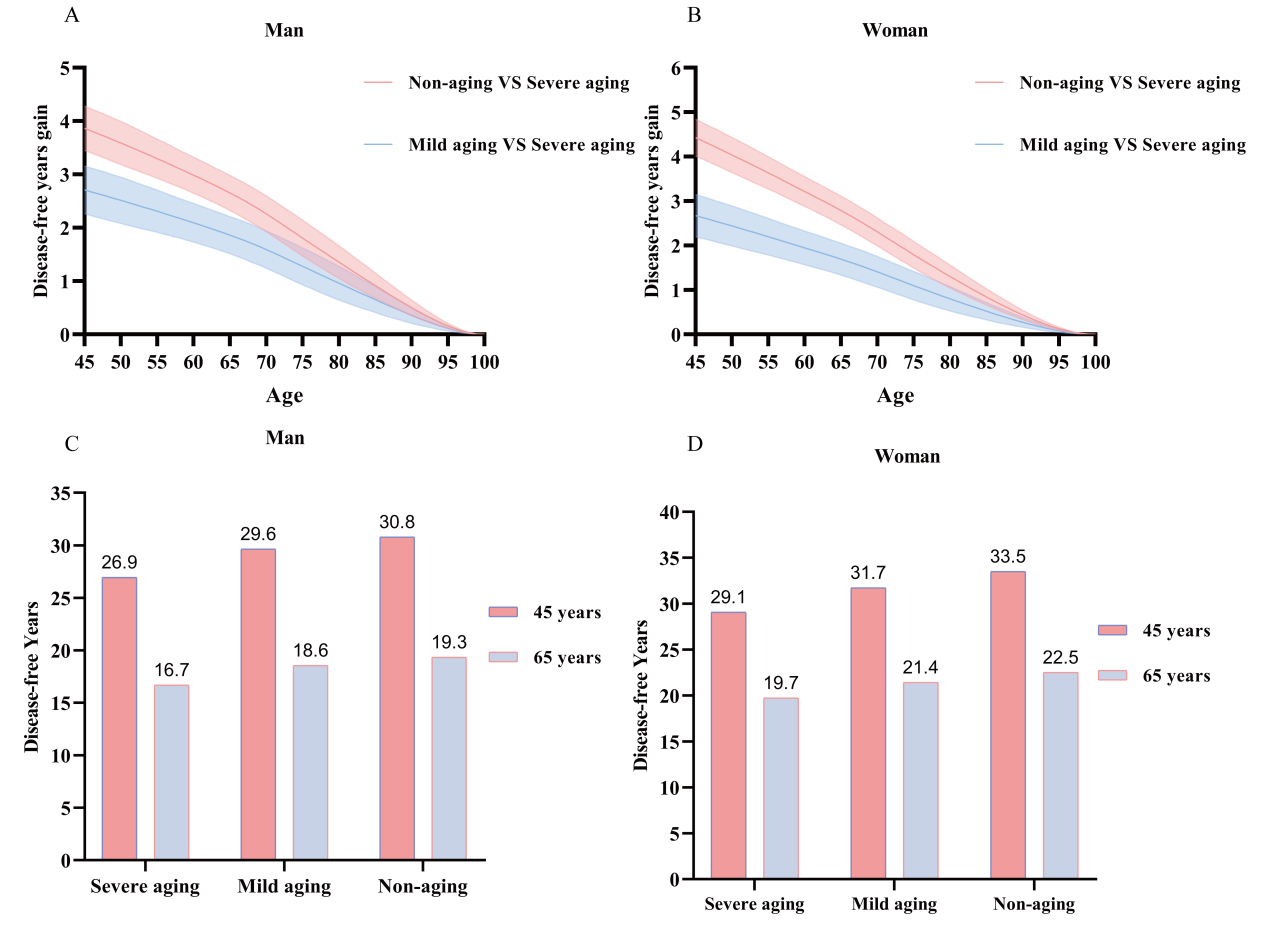


(A) Disease-free years gain in severe aging by PhenoAgeAcce compared with the other aging groups among men in the UK Biobank. (B) Disease-free years gain in severe aging by PhenoAgeAcce compared with the other aging groups among women in UK Biobank. (C)The expected disease-free years are estimated to be 45 and 65 years for UKB male participants. (D)The expected disease-free years are estimated to be 45 and 65 years for UKB female participants.

# Supplementary Figure S7. The estimated increase in disease-free years based among the UKB population aged 45 to 100 excluding participants with onset of disease within 2 years of baseline


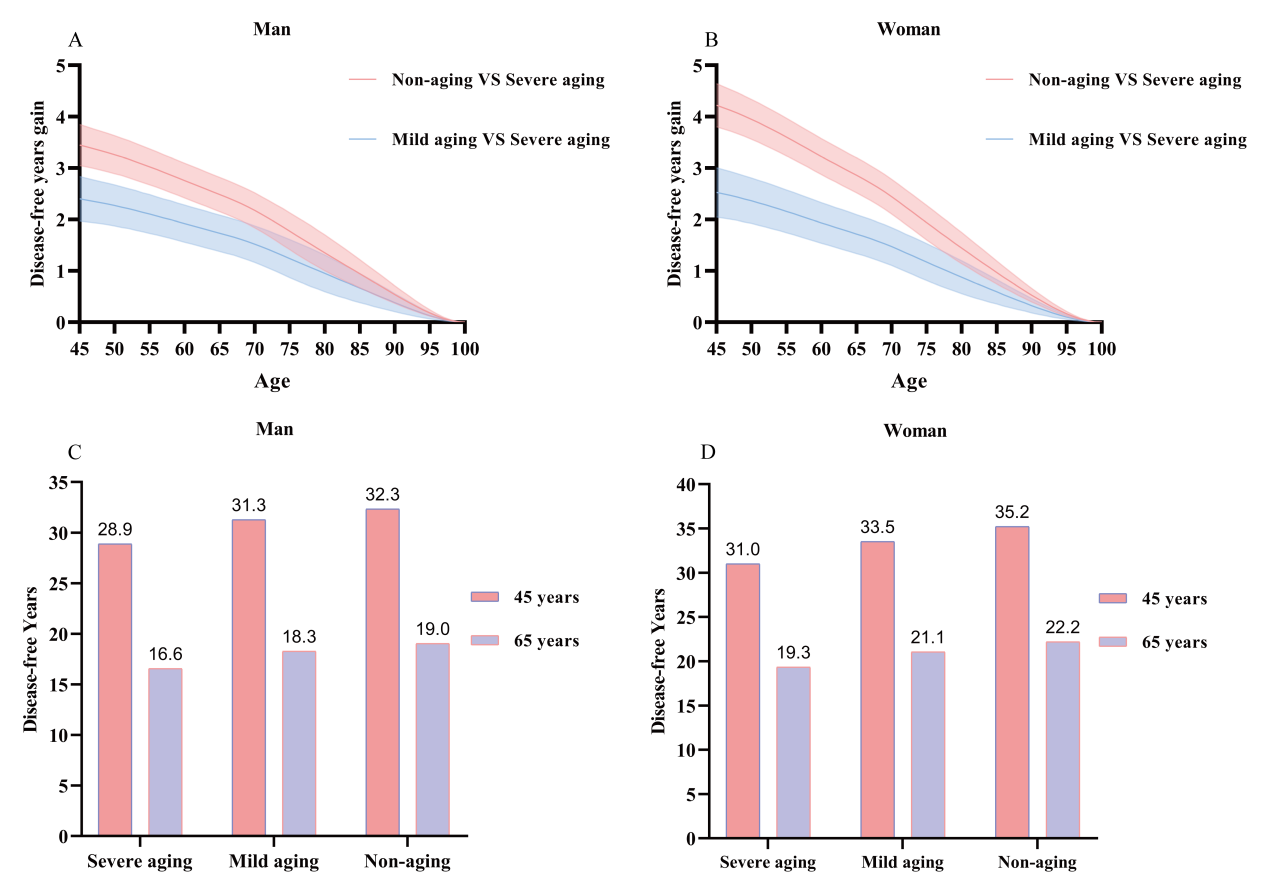


(A) Disease-free years gain in severe aging by PhenoAgeAcce compared with the other aging groups among men in the UK Biobank. (B) Disease-free years gain in severe aging by PhenoAgeAcce compared with the other aging groups among women in UK Biobank. (C)The expected disease-free years are estimated to be 45 and 65 years for UKB male participants. (D)The expected disease-free years are estimated to be 45 and 65 years for UKB female participants.

# Supplementary Figure S8. The estimated increase in disease-free years based among the UKB population aged 45 to 100 after restricting the analysis to participants with complete covariates in the UK Biobank.


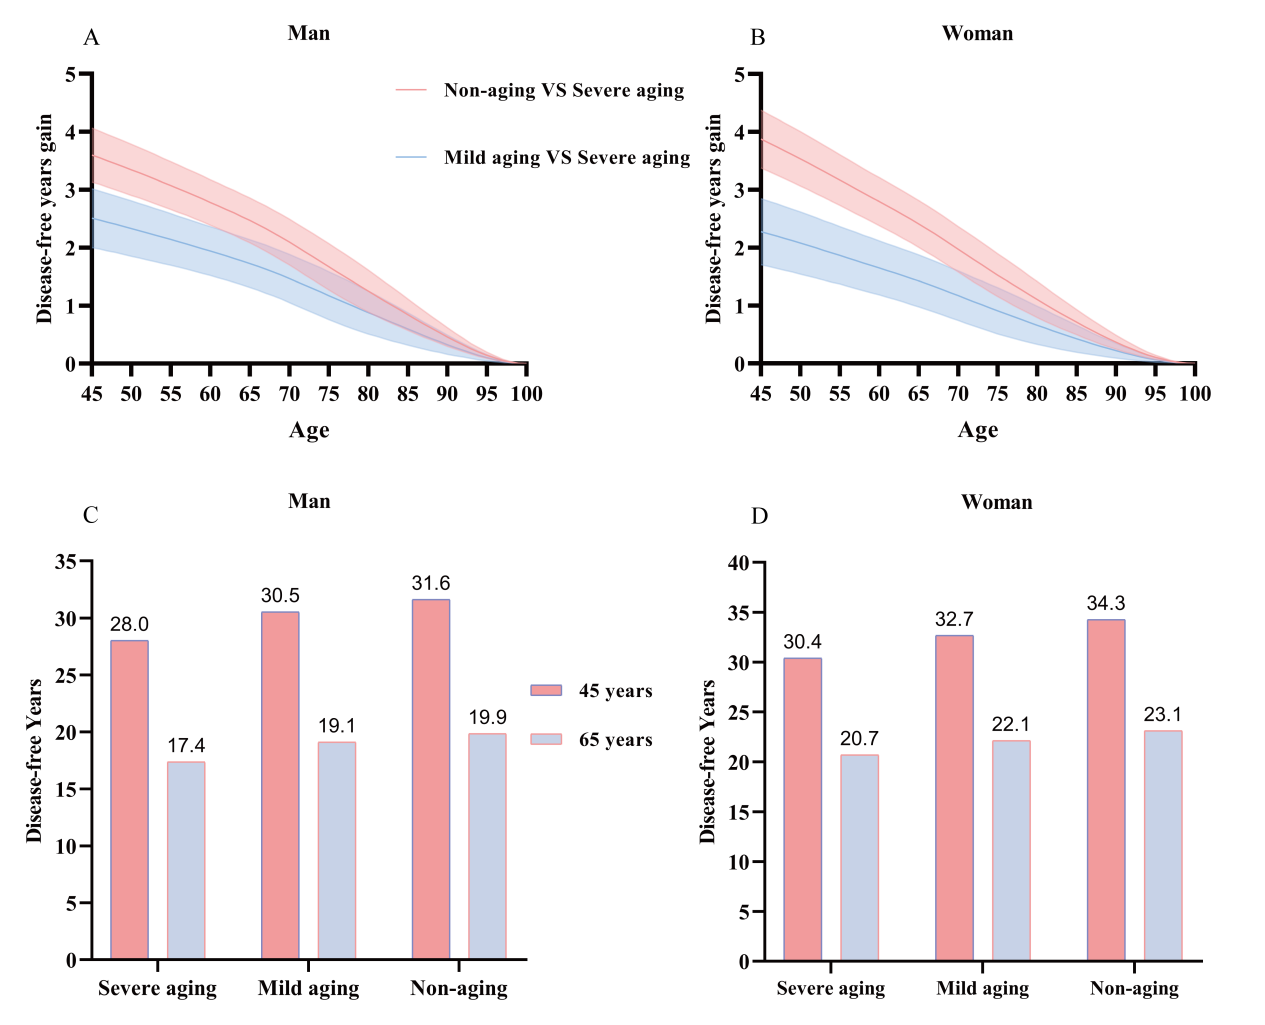


(A) Disease-free years gain in severe aging by PhenoAgeAcce compared with the other aging groups among men in the UK Biobank. (B) Disease-free years gain in severe aging by PhenoAgeAcce compared with the other aging groups among women in UK Biobank. (C)The expected disease-free years are estimated to be 45 and 65 years for UKB male participants. (D)The expected disease-free years are estimated to be 45 and 65 years for UKB female participants.

# Supplementary Figure S9. The estimated increase in disease-free years based among the UKB population aged 45 to 100 excluding single disease.


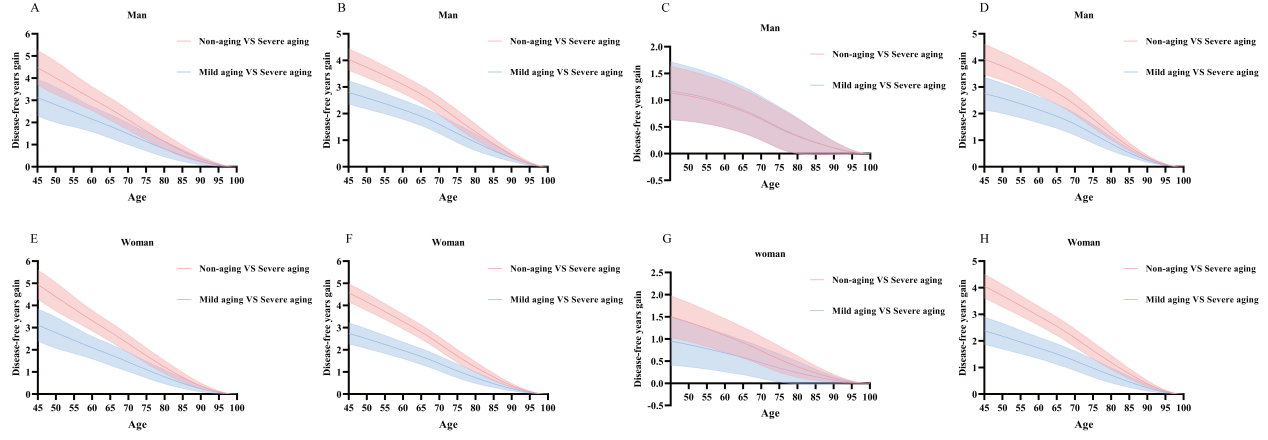


(A) Major diseases without dementia

(B) Major diseases without cancer

(C) Major diseases without respiratory disease

(D) Major diseases without diabetes

# Supplementary Figure S10. The estimated increase in disease-free years based amongthe Chinese cohort population aged 45 to 100 excluding single disease .


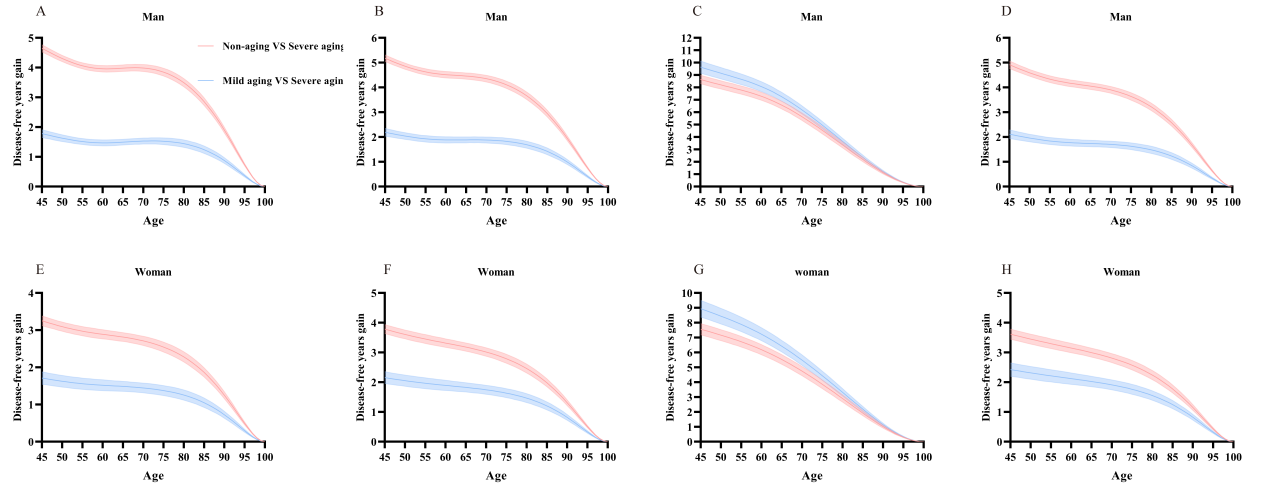


(A) Major diseases without dementia

(B) Major diseases without cancer

(C) Major diseases without respiratory disease

(D) Major diseases without diabetes

# Supplementary Figure S11. The estimates of disease-free years and the gain of disease-free years at age 45 and 65 among participants after filling in missing values for biomarks in the UK Biobank.


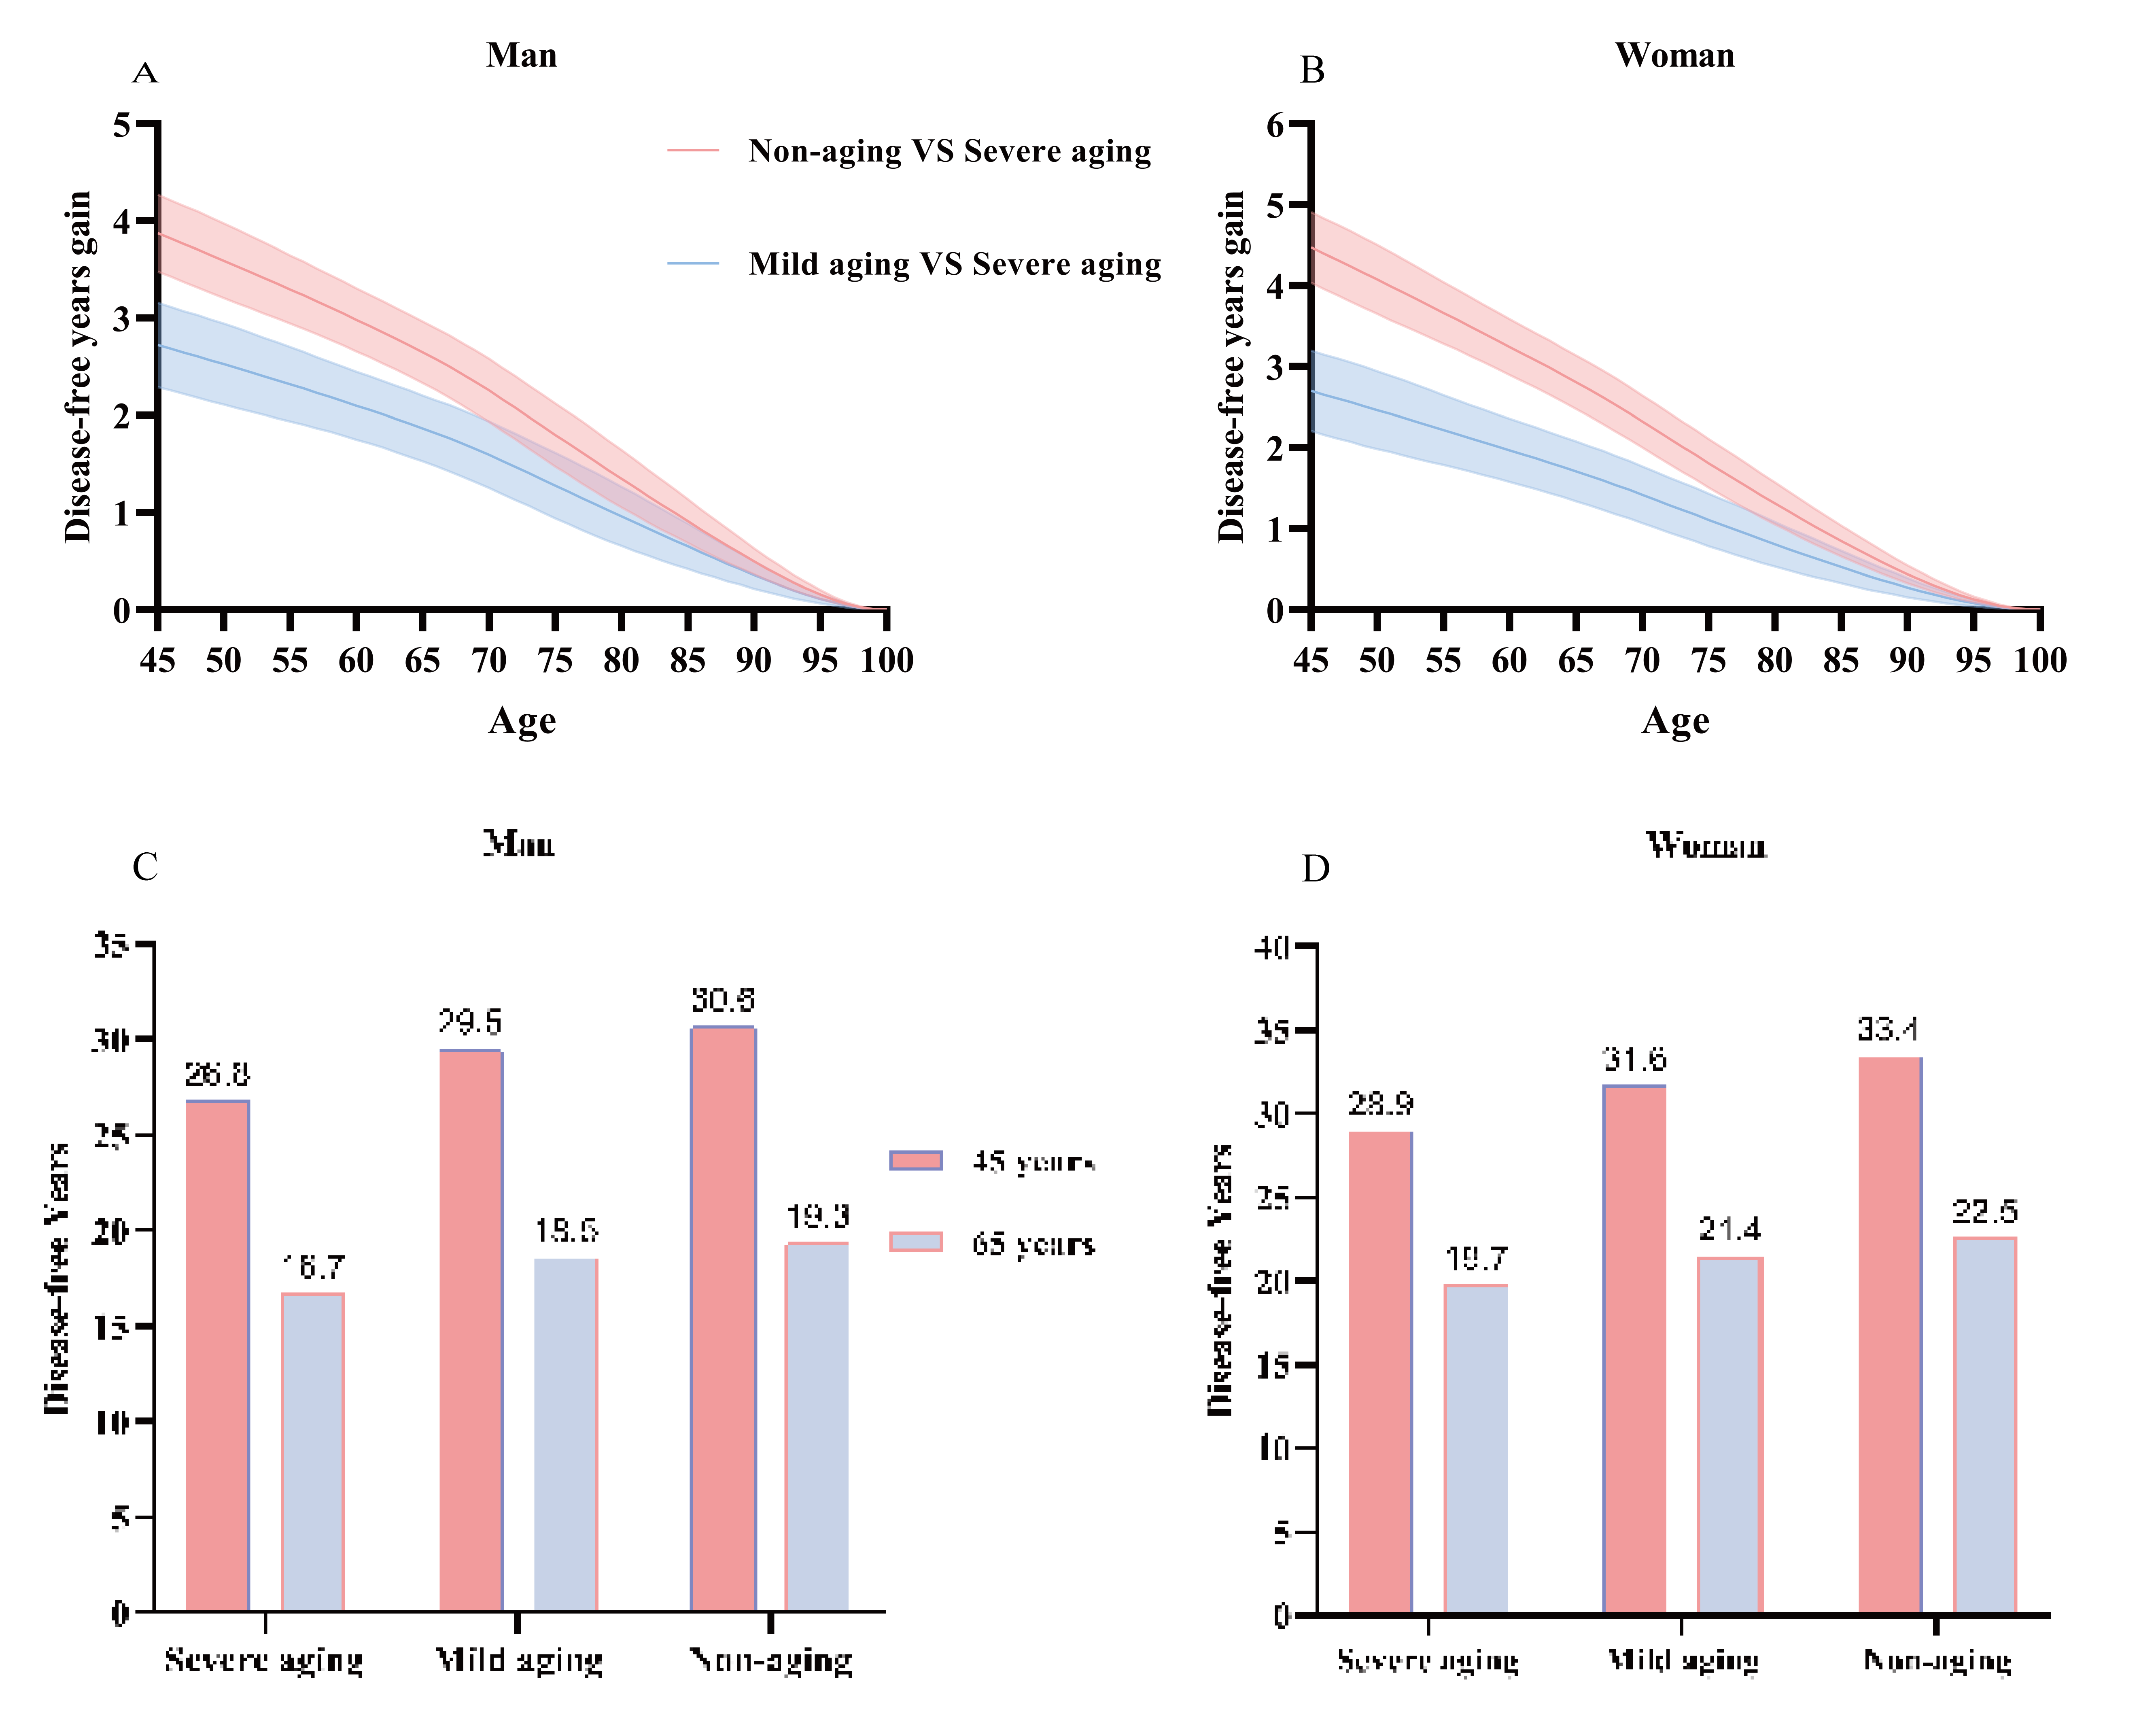


# Supplementary Figure S12. The estimated increase in disease-free years among the UKB and the Chinese cohort population aged 45 to 100


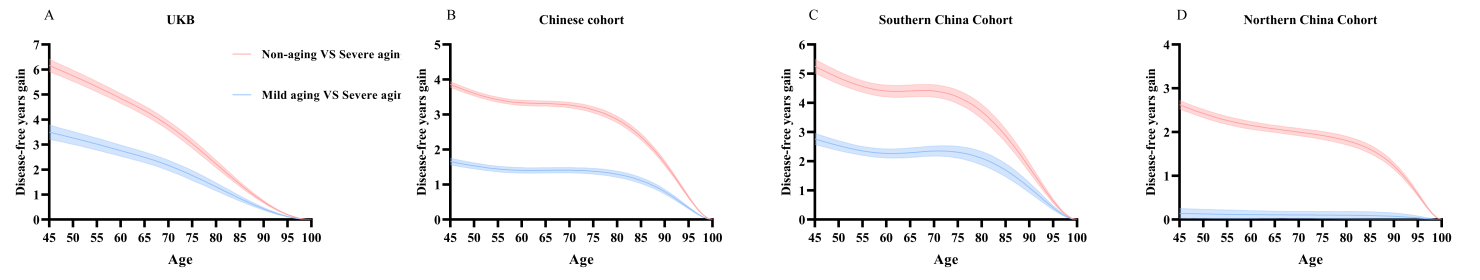


(A) Disease-free years gain in severe aging by PhenoAgeaccel compared with the other aging groups among total population in the UK Biobank based on three categories. (B) Disease-free years gain in severe aging by PhenoAgeaccel compared with the other aging groups among total population in China cohort based on three categories. (C) Disease-free years gain in severe aging by PhenoAgeaccel compared with the other aging groups among total population in southern China cohort based on three categories. (D) Disease-free years gain in severe aging by PhenoAgeaccel compared with the other aging groups among total population in northern China based on three categories.

# Supplementary Figure S13. Distribution of PhenoAgeAccel across different disease states in sourthern and northern chinese cohort.


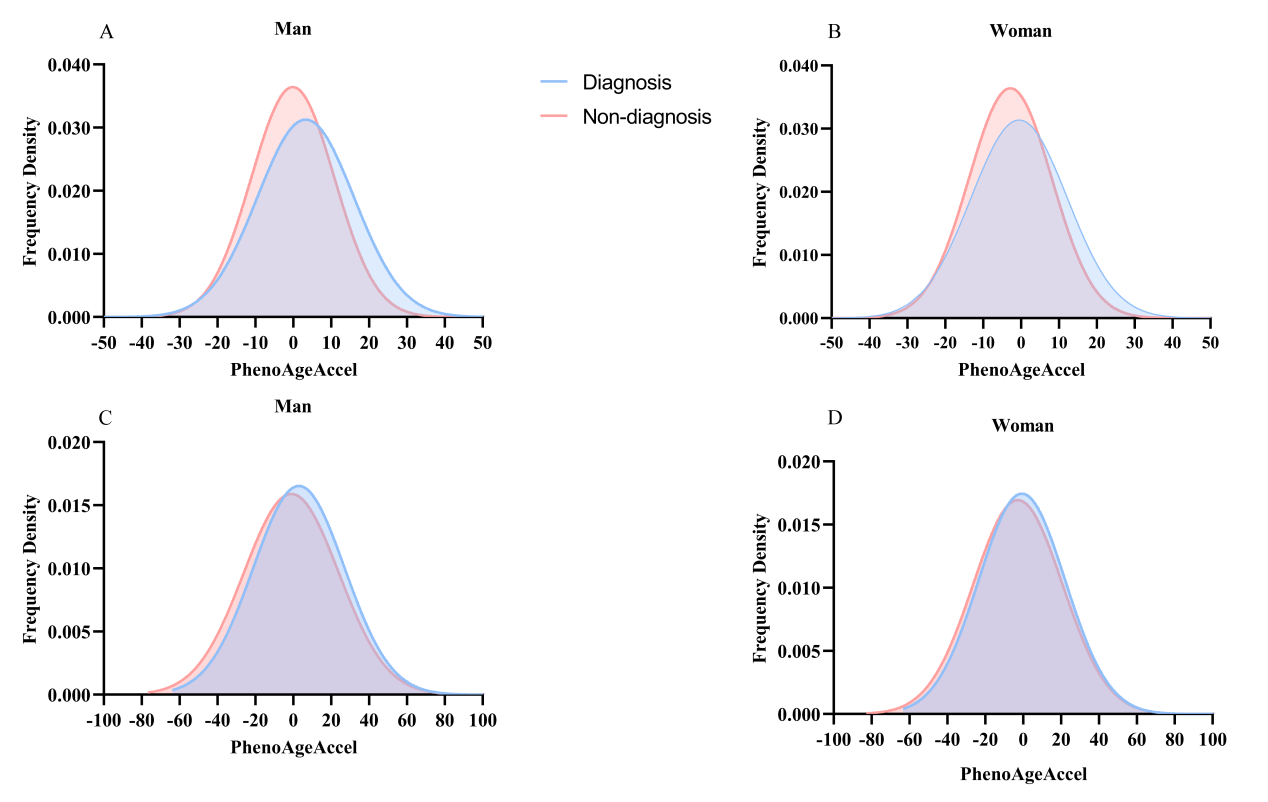


(A)Distribution of PhenoAgeAccel across different disease states of adults among men in southern Chinese cohort.

(B) Distribution of PhenoAgeAccel across different disease states of adults among women in southern Chinese cohort.

(C) Distribution of PhenoAgeAccel across different disease states of adults among men in northern Chinese cohort.

(D) Distribution of PhenoAgeAccel across different disease states of adults among women in northern Chinese cohort.

# Supplementary Figure S14. Trends in PhenoAge as a function of chronological age.


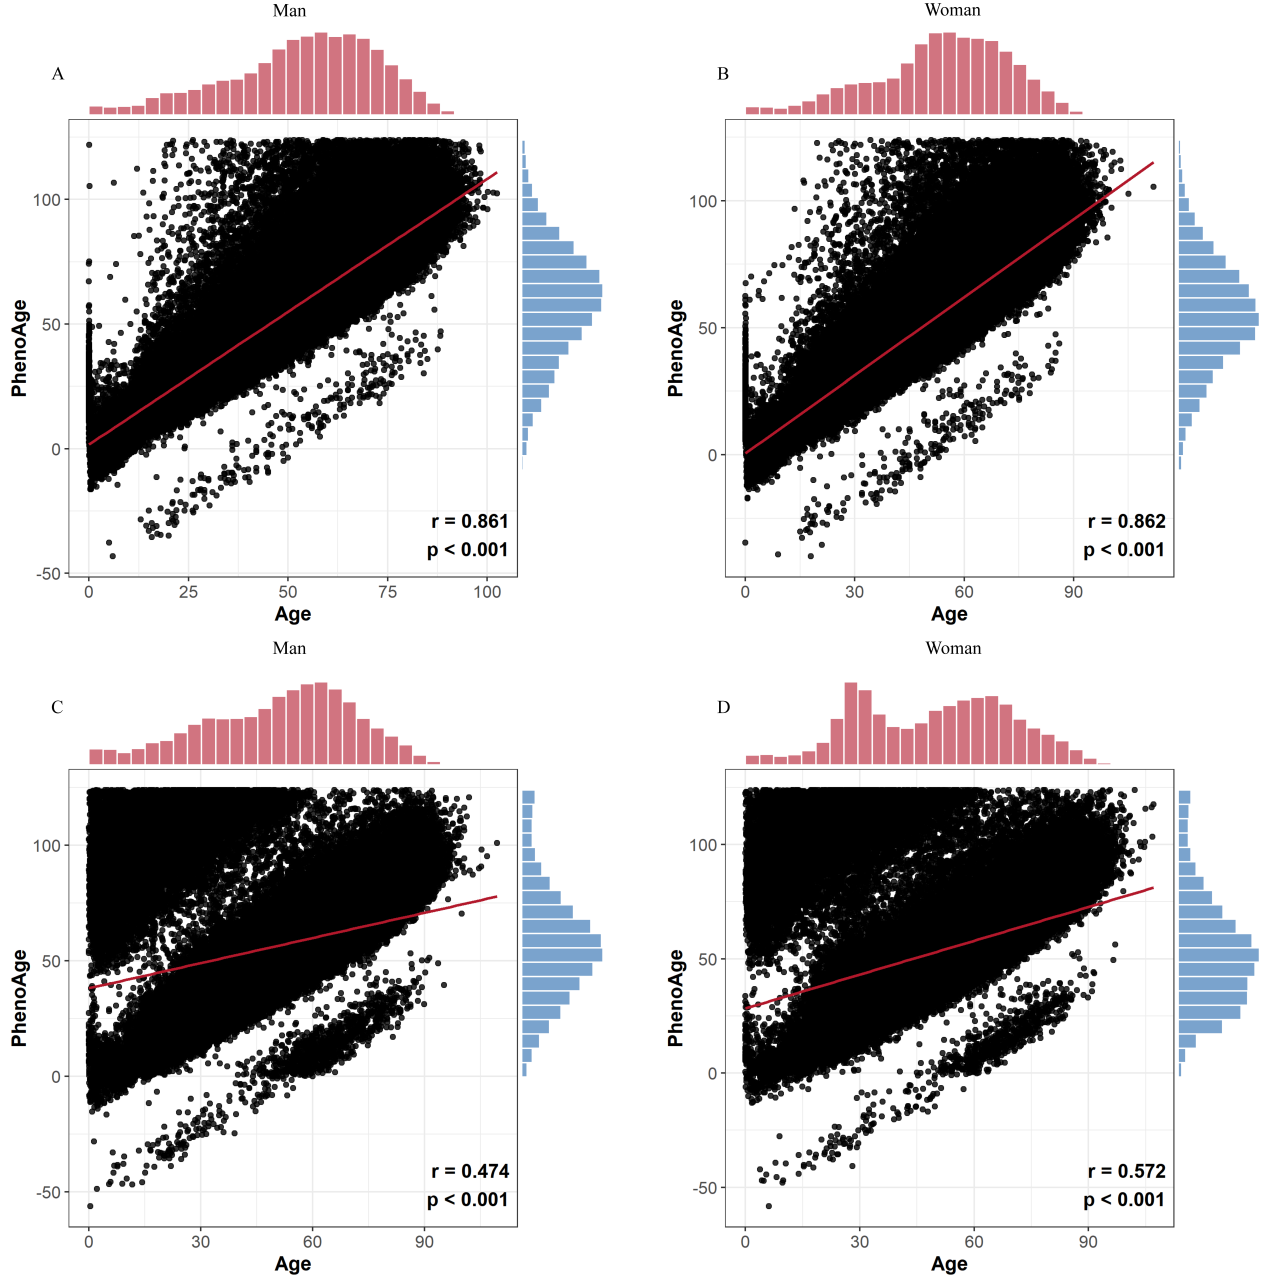


(A)Trends in PhenoAge as a function of chronological age of adults among men in southern Chinese cohort.

(B) Trends in PhenoAge as a function of chronological age of adults among women in the southern Chinese cohort.

(C) Trends in PhenoAge as a function of chronological age of adults among men in northern Chinese cohort.

(D) Trends in PhenoAge as a function of chronological age of adults among women in northern Chinese cohort.

The red line depicts the expected PhenoAge for each chronological age, with points above the line depicting people who were phenotypically older than expected, and points below the line depicting those who were phenotypically younger than expected.

# Supplementary Figure S15. The estimated increase in disease-free years among the Northern and Southern China Cohort population aged 45 to 100


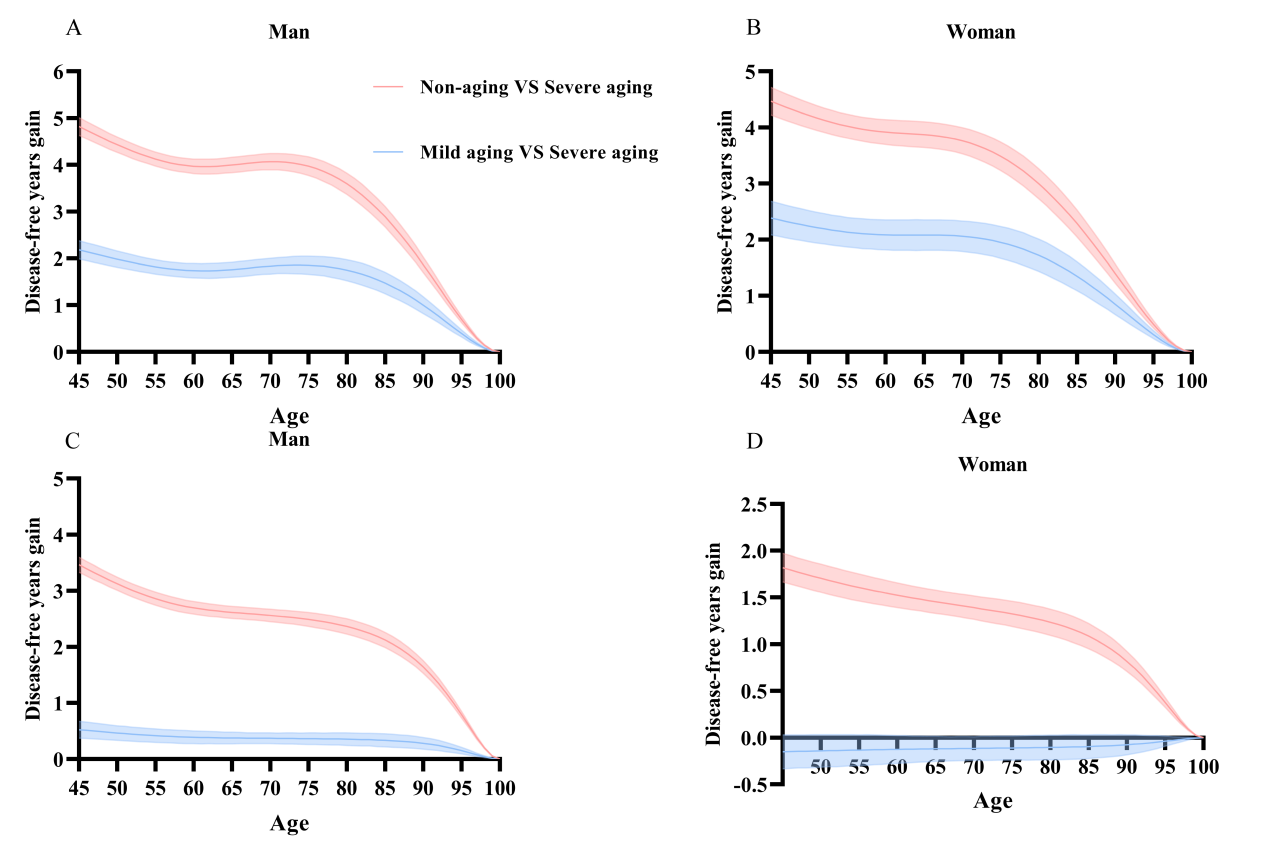


(A) Disease-free years gain in severe aging by PhenoAgeaccel compared with the other aging groups among men in southern Chinese cohort.(B) Disease-free years gain in severe aging by PhenoAgeaccel compared with the other aging groups among women in southern Chinese cohort(C) Disease-free years gain in severe aging by PhenoAgeaccel compared with the other aging groups among men in northern Chinese cohort.(D) Disease-free years gain in severe aging by PhenoAgeaccel compared with the other aging groups among women in northern Chinese cohort.

# Supplementary Figure S16. The estimated increase in disease-free years among the Northern and Southern China Cohort population aged 45 to 100


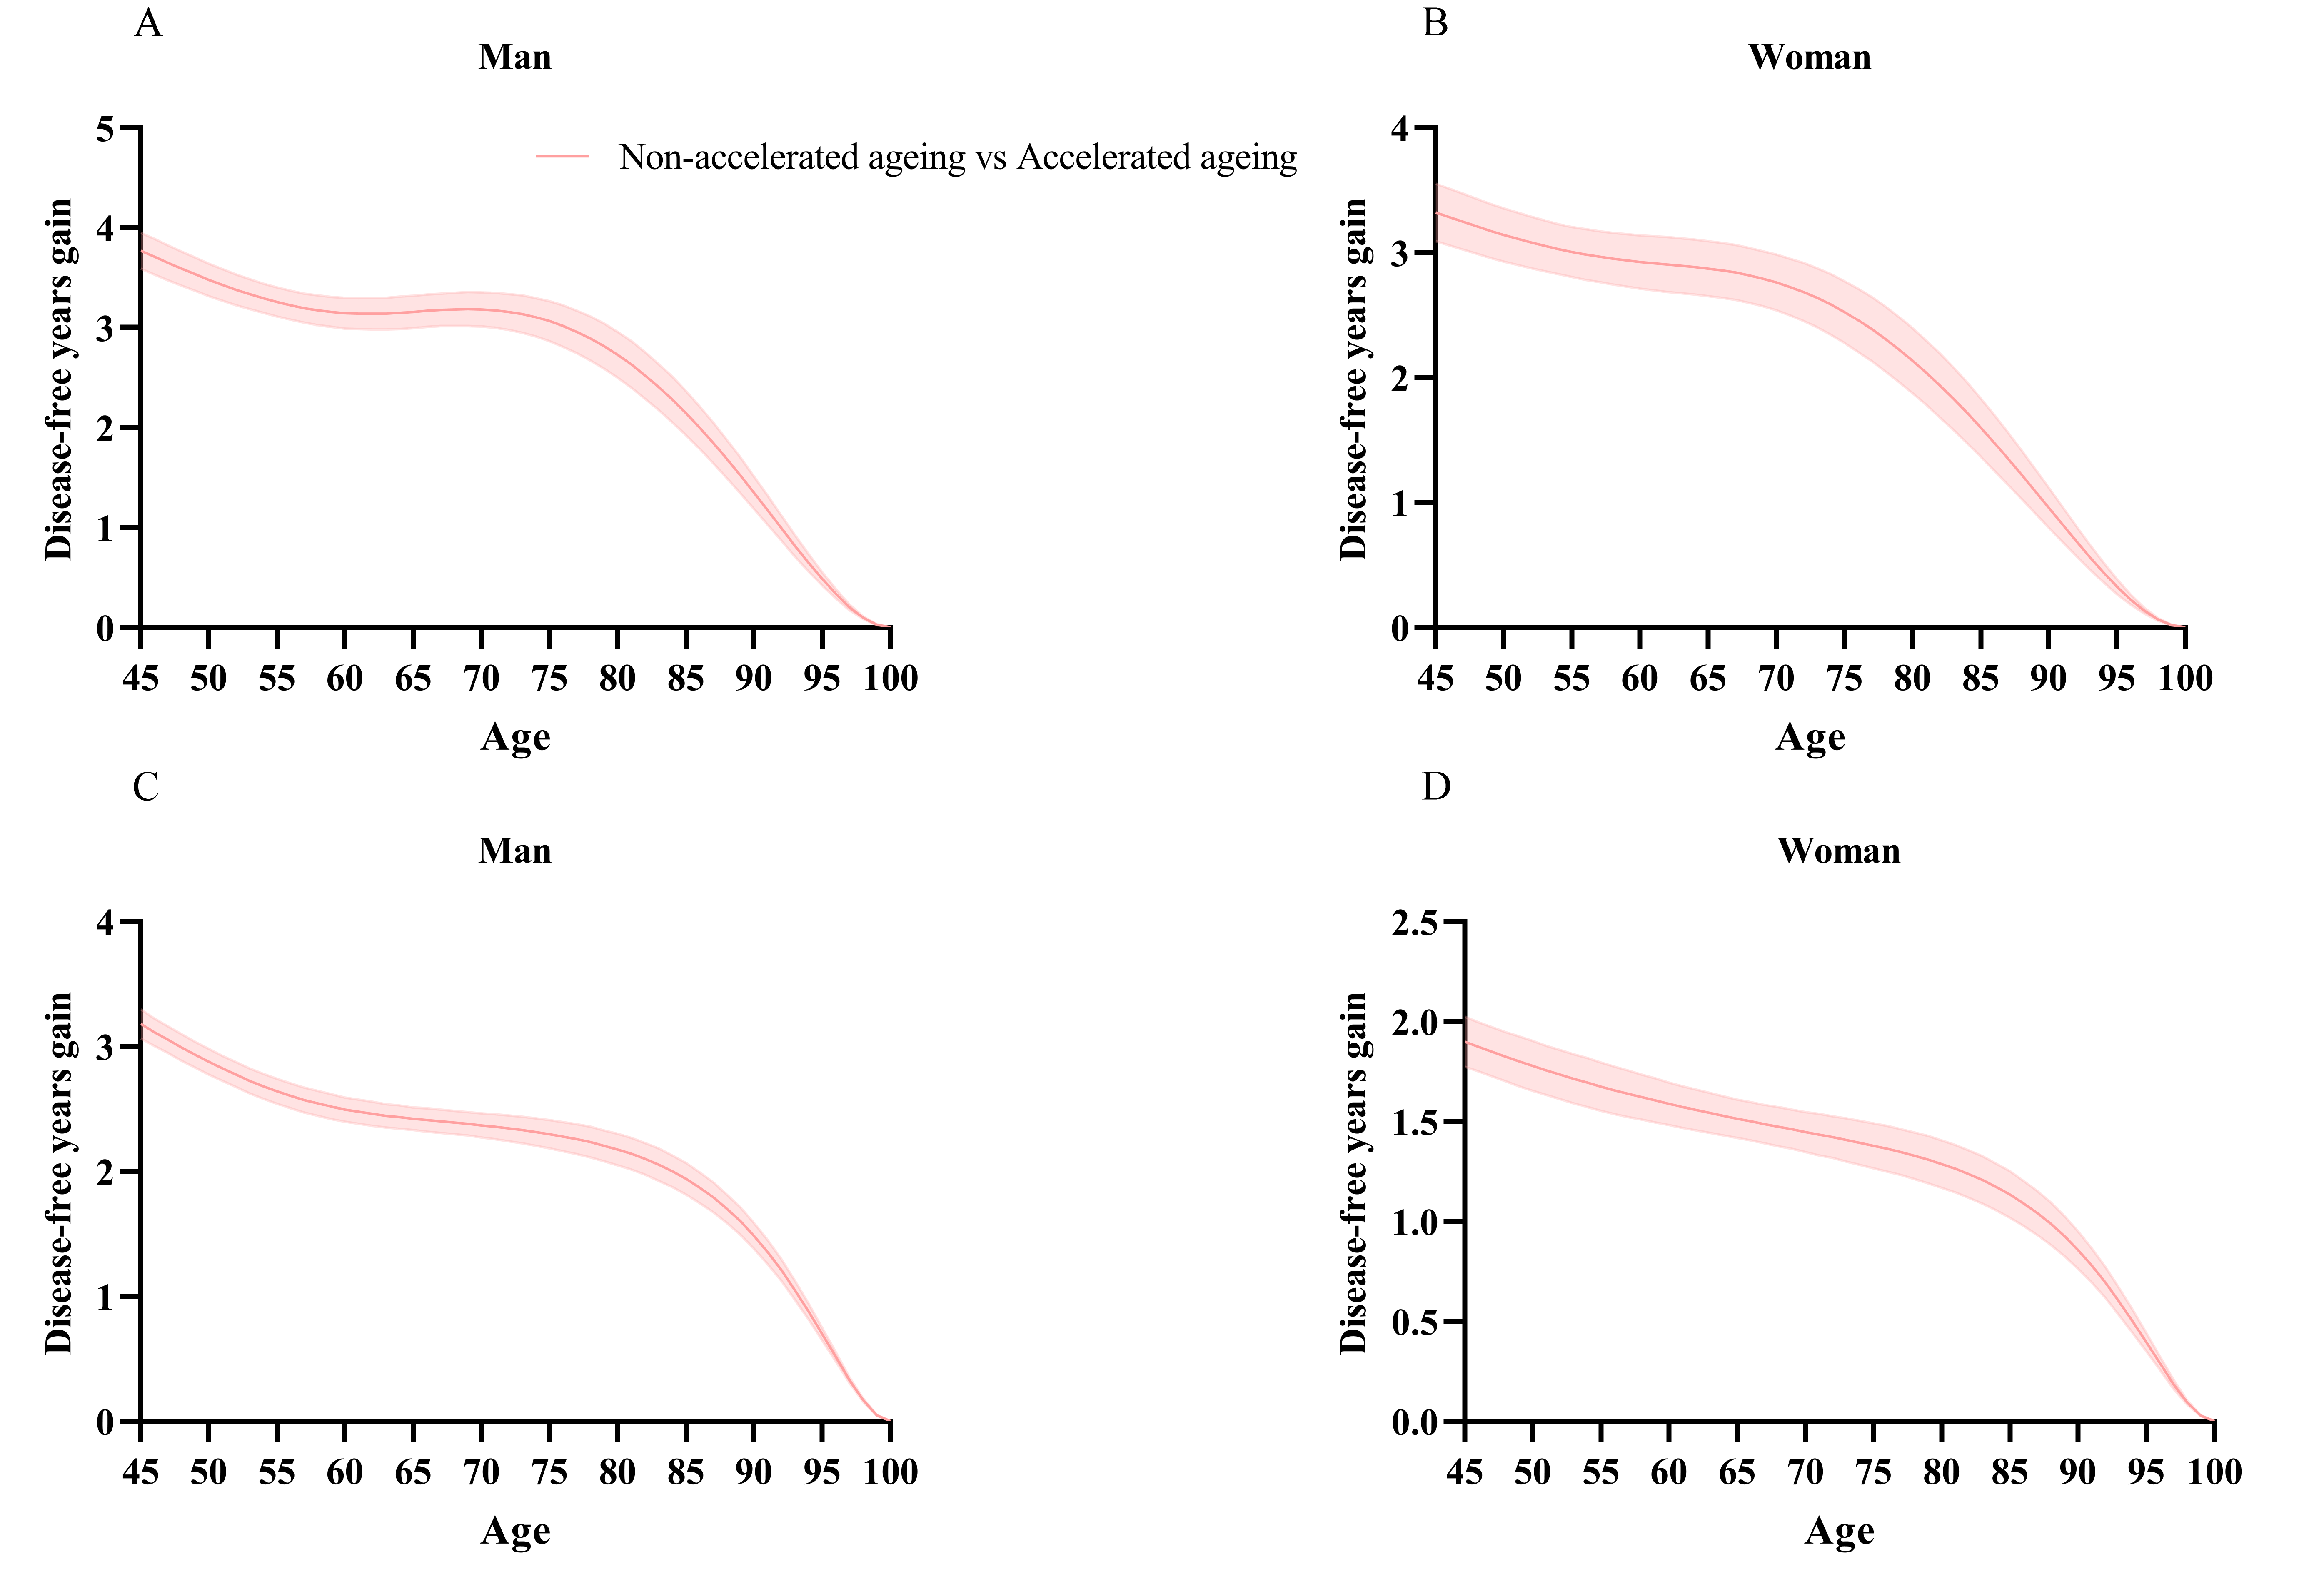


(A) Disease-free years gain in Accelerated ageing by PhenoAgeaccel compared with the other aging groups among men in southern Chinese cohort based dichotomous classification. (B) Disease-free years gain in Accelerated ageing by PhenoAgeaccel compared with the other aging groups among women in southern Chinese cohort based on based dichotomous classification. (C) Disease-free years gain in Accelerated ageing by PhenoAgeaccel compared with the other aging groups among men in northern Chinese cohort based dichotomous classification. (D) Disease-free years gain in Accelerated ageing by PhenoAgeaccel compared with the other aging groups among women in northern Chinese cohort based dichotomous classification

# Supplementary Figure S17. The estimated increase in disease-free years based on tertiles among the Northern and Southern China Cohort population aged 45 to 100


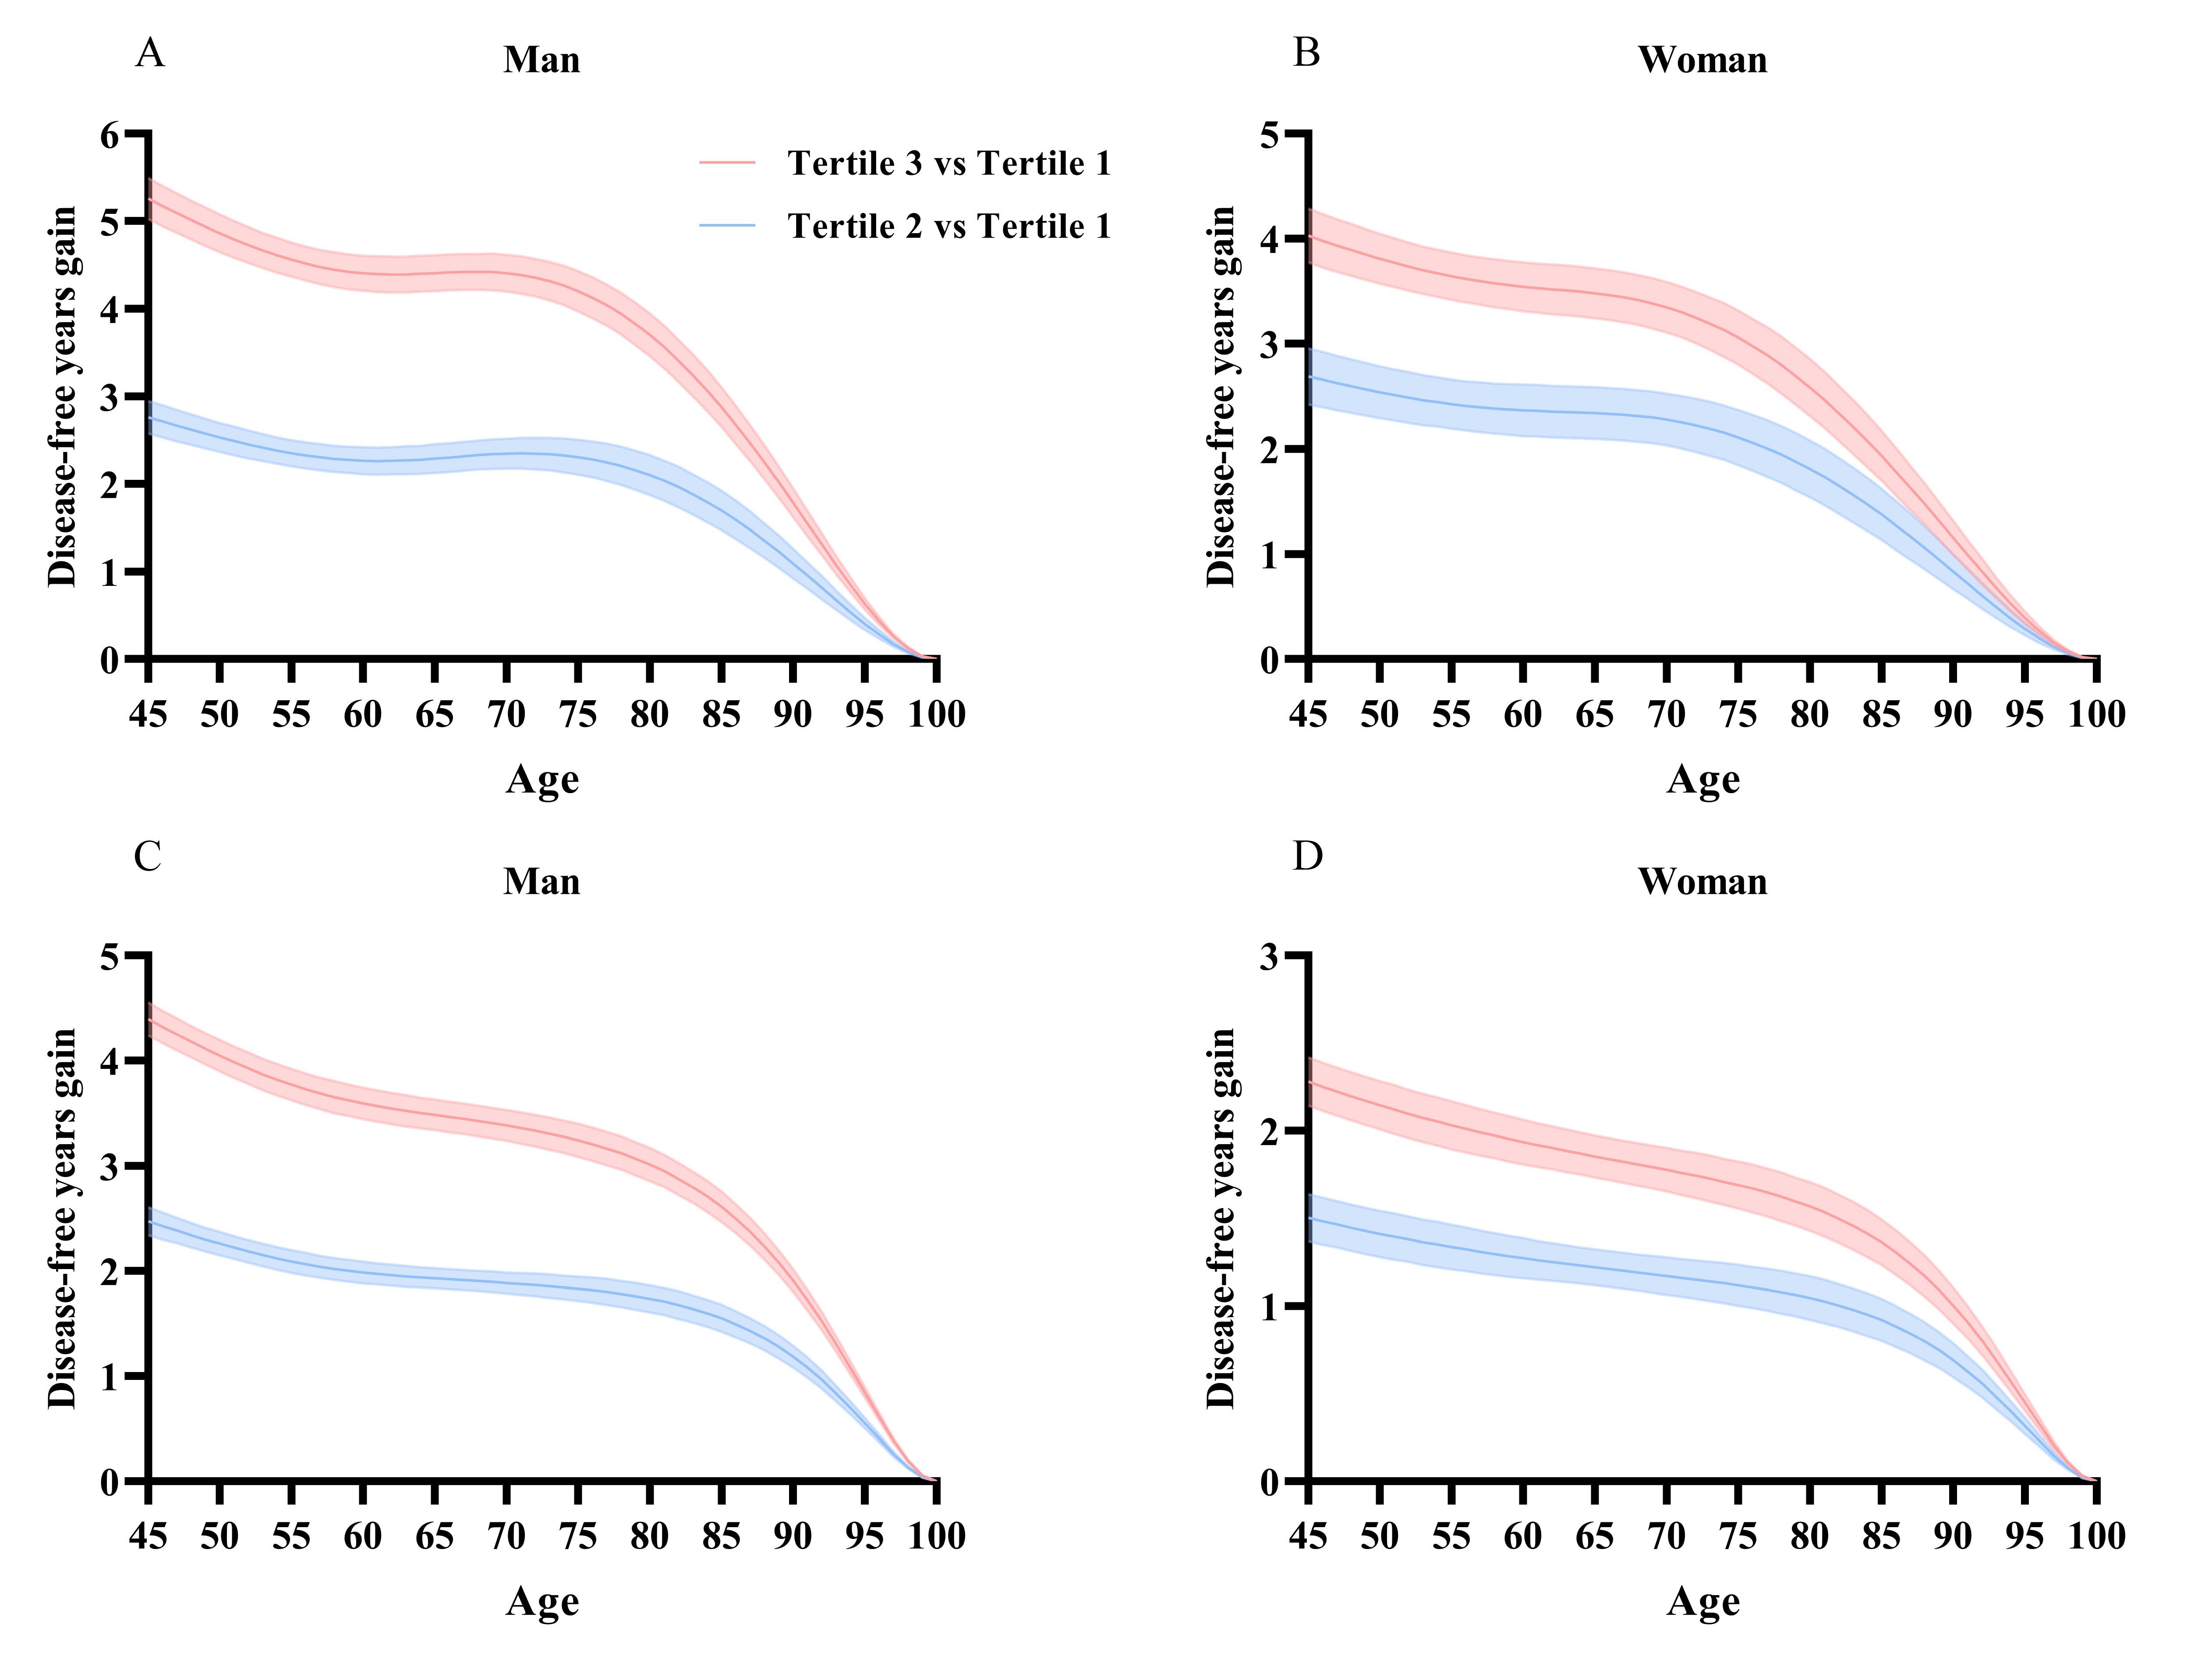


(A) Disease-free years gain in Tertile 1 by PhenoAgeaccel compared with the other aging groups among men in southern Chinese cohort based on tertile. (B) Disease-free years gain in Tertile 1 by PhenoAgeaccel compared with the other aging groups among women in southern Chinese cohort based on based on tertile. (C) Disease-free years gain in Tertile 1 by PhenoAgeaccel compared with the other aging groups among men in northern Chinese cohort based on tertile. (D) Disease-free years gain in Tertile 1 by PhenoAgeaccel compared with the other aging groups among women in northern Chinese cohort based on tertile.

# Supplementary Figure S18. The estimated increase in disease-free years based on quartiles among the Northern and Southern China Cohort population aged 45 to 100


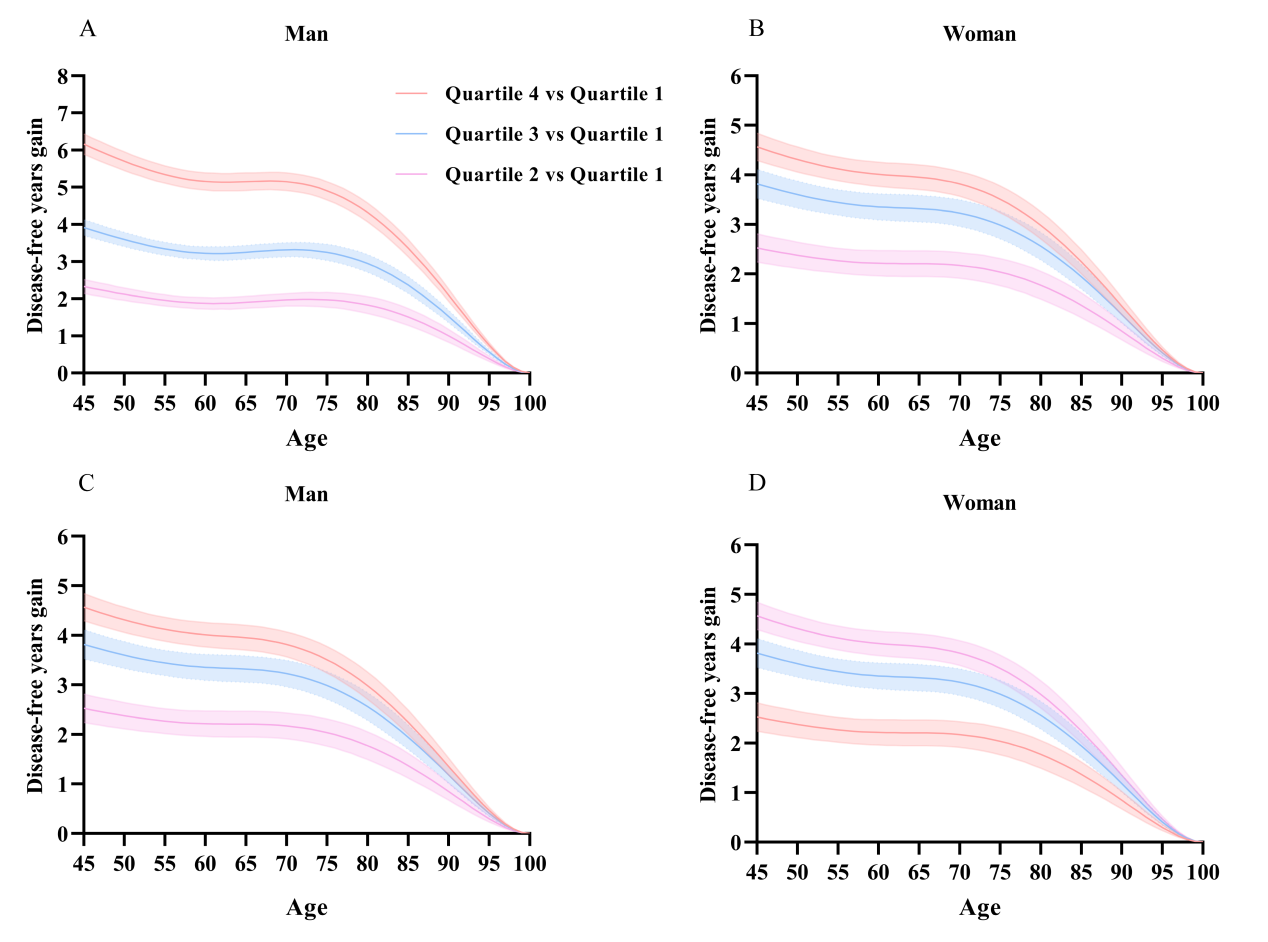


(A) Disease-free years gain in Quartile 1 by PhenoAgeaccel compared with the other aging groups among men in southern Chinese cohort based on quartering. (B) Disease-free years gain in Quartile 1 by PhenoAgeaccel compared with the other aging groups among women in southern Chinese cohort based on based on quartering. (C) Disease-free years gain in Quartile 1 by PhenoAgeaccel compared with the other aging groups among men in northern Chinese cohort. based on quartering. (D) Disease-free years gain in Quartile 1 by PhenoAgeaccel compared with the other aging groups among women in northern Chinese cohort based on quartering.

# Supplementary Figure S19. **Webpage application interface**


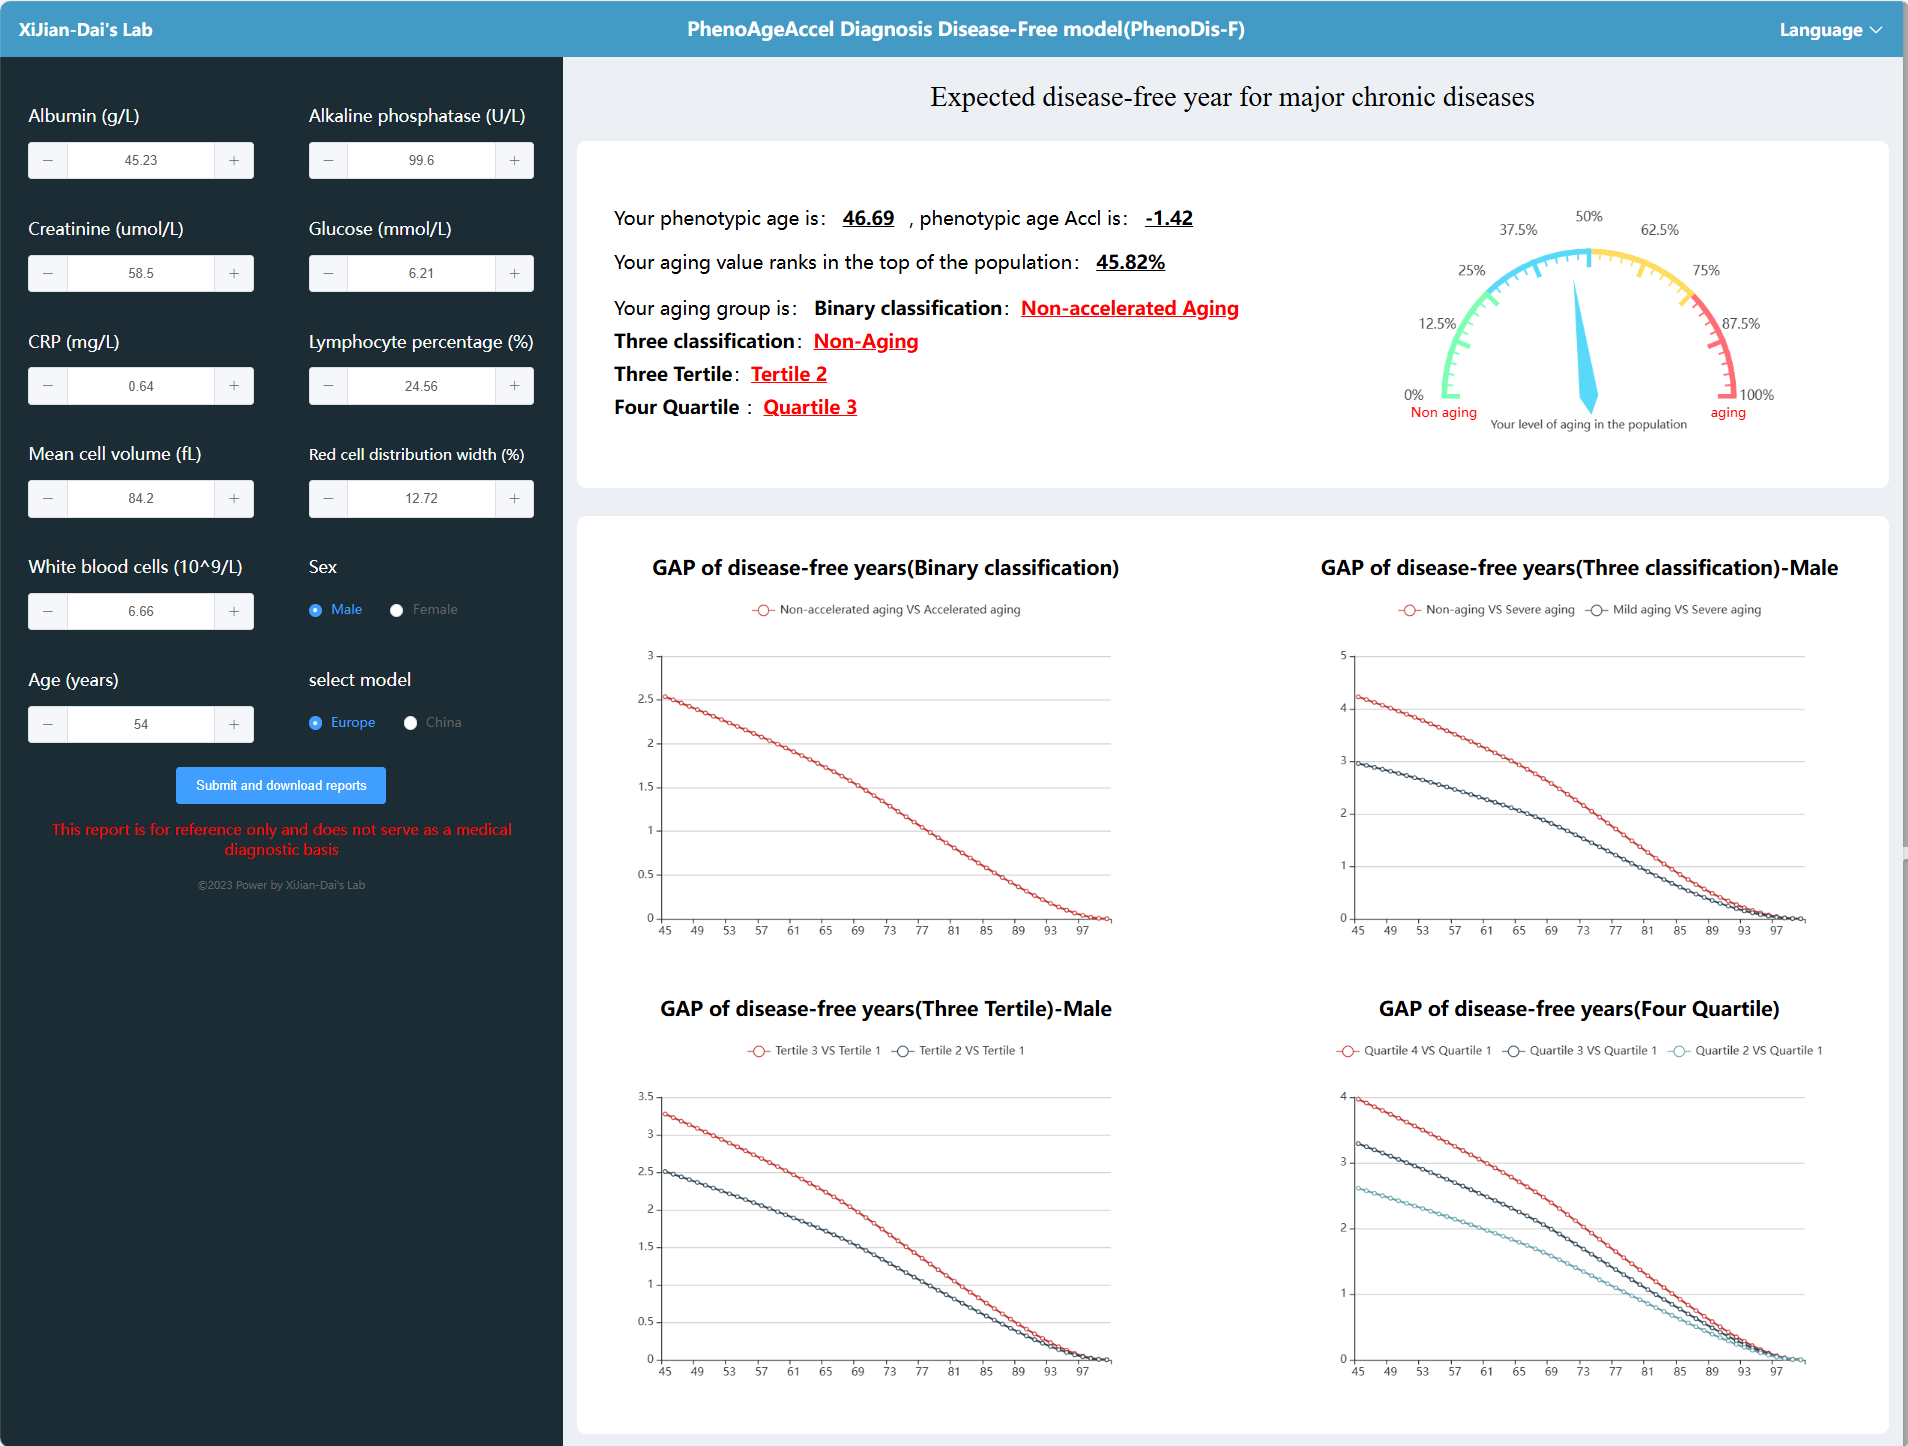


# Supplementary Figure S20: PhenoAge acceleration is associated with increased incidence risk.

**
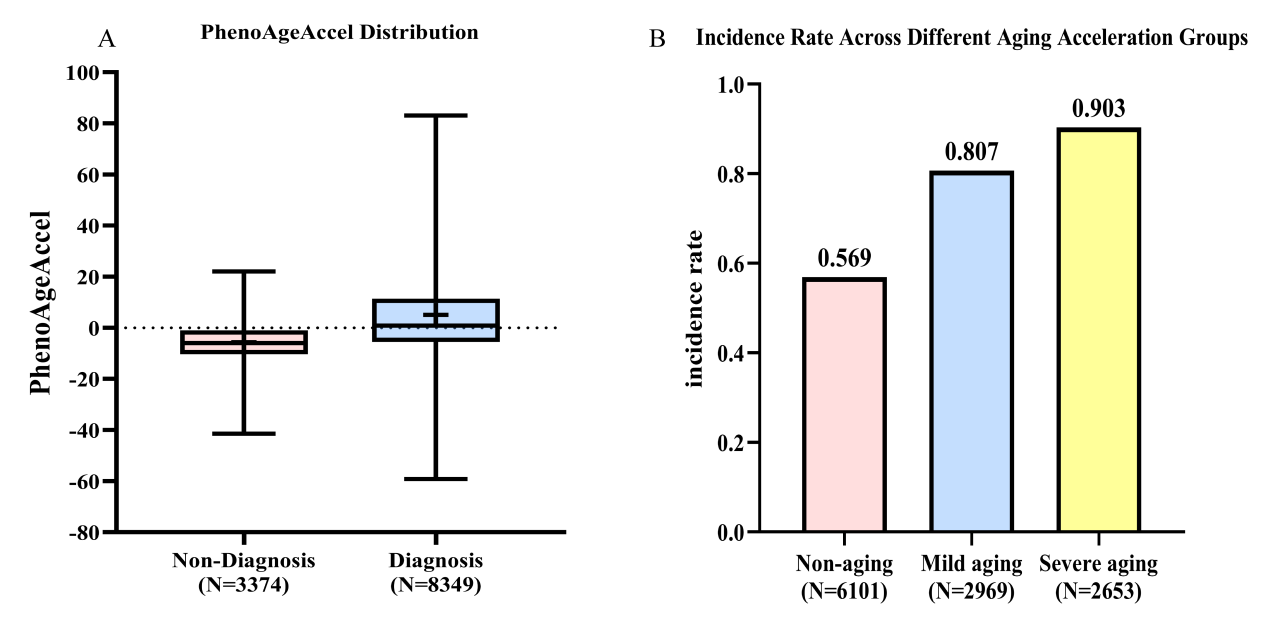
**

(A) Distribution of PhenoAge acceleration values (PhenoAgeAccel) between the non-diagnosis group and the diagnosis group. The pink box plot represents the non-diagnosis group (n=3374), while the blue violin plot represents patients in the diagnosis group (n=8349). (B) Prevalence distribution across different PhenoAge acceleration groups. Yellow, blue, and pink bar charts represent the severe aging group (n=2653), mild aging group (n=2969), and non-aging group (n=6101), respectively.

# Supplementary Table S1. ICD-10 Codes for chronic diseases

| **Major chronic disease** | **ICD-10 codes** |
| --- | --- |
| diabetes | E10-16, G59.0, G63.2, H28.0, H36.0, M14.2, N08.3, O24.X, T38.3, Y42.3 |
| cancer | C00-C97, except for C44 (non-melanoma skin cancer), D01.0, D02.0, D09.0 |
| dementia | F00-F05, G300,G301,G308,G309 |
| Respiratory diseases | I26 for pulmonary embolism  I27 for other pulmonary heart diseases  J00-J06 for acute upper respiratory infections  J09-J18 for influenza and pneumonia  J20-J22 for other acute lower respiratory infections  J30-J39 for other diseases of upper respiratory tract  J40-J47 for chronic lower respiratory diseases  J60-J70 for lung diseases due to external agents  J80-J84 for other respiratory diseases principally affecting the interstitium  J85-J86 for suppurative and necrotic conditions of lower respiratory tract  J90-J94 for other diseases of pleura  J95-J99 for other diseases of the respiratory system |

# Supplementary Table S2. Field ID of covariates and expouse factors used in this study in the UK Biobank

| **Phenotype** | **Field ID** |
| --- | --- |
| **Exposure** |  |
| Albumin | 30600-0.0 |
| Alkaline Phosphatase | 30610-0.0 |
| Creatinine | 30700-0.0 |
| Glucose | 30740-0.0 |
| C-reactive Protein | 30710-0.0 |
| Lymphocyte percent | 30180-0.0 |
| Mean Cell Volume | 30270-0.0 |
| Red Cell Distribution Width | 30070-0.0 |
| White Blood Cells | 30000-0.0 |
| Genotype | 22000-0.0 |
| **Covariates** |  |
| Age | 21022-0.0 |
| Sex | 31-0.0 |
| Education | 26414-0.0 26421-0.0 26431-0.0 |
| BMI | 21001-0.0 |
| Smoking Status | 20116-0.0 |
| sleep duration | 1160-0.0 |
| employment status | 6142-0.0 |
| Average income of households | 738-0.0 |
| Dietary changes | 1538-0.0 |
| Aspirin | 6154-0.0 |

# Supplementary Table S3. Baseline characteristics in the UKB

| characteristics | Man | | | Woman | | |
| --- | --- | --- | --- | --- | --- | --- |
| Severe aging | Mild aging | Non-aging | Severe aging | Mild aging | Non-aging |
| **Age, mean (SD), years** | 57.76(8.18) | 57.04 (8.18) | 56.39 (8.16) | 55.40（8.34） | 56.37(8.18） | 57.18(7.77) |
| **No of participants (%),Total** | 33900(23.8) | 36271(25.5) | 72111(50.7) | 31153(18.7) | 33112(19.9) | 102263(61.4) |
| **BMI** |  |  |  |  |  |  |
| **<30** | 23721(70.0) | 26710(73.6) | 57550(79.8) | 20150(64.7) | 23914(72.2) | 85535(83.6) |
| **>=30** | 10179(30.0) | 9561(26.4) | 14561(20.2) | 11003(35.3) | 9198(27.8) | 16728(16.4) |
| **Education** |  |  |  |  |  |  |
| **College** | 9761(28.8) | 12245(33.8) | 27744(38.5) | 8857(28.4) | 10138(30.6) | 34248(33.5) |
| **Non-college** | 24139(71.2) | 24026(66.2) | 44367(61.5) | 22296(71.6) | 22974(69.4) | 68015(66.5) |
| **Smoking status** |  |  |  |  |  |  |
| **Never smoking** | 14511(42.8) | 18094(49.9) | 39055(54.2) | 17811(57.2) | 19539(59) | 63221(61.8) |
| **Previous or current smoking** | 19389(57.2) | 18177(50.1) | 33056(45.8) | 13342(42.8) | 13573(41) | 39042(38.2) |
| **Sleep Duration** |  |  |  |  |  |  |
| **<=6h** | 9065(26.7) | 9175(25.3) | 17138(23.8) | 7793(25.0) | 7849(23.7) | 23441(22.9) |
| **>=7h** | 24835(73.3) | 27096(74.7) | 54973(76.2) | 23360(75.0) | 25263(76.3) | 78822(77.1) |
| **Average income of households** |  |  |  |  |  |  |
| **>=31000** | 18378(54.2) | 21983(60.6) | 46991(65.2) | 17085(54.8) | 19040(57.5) | 61342(60.0) |
| **<31000** | 15522(45.8) | 14288(39.4) | 25120(34.8) | 14068(45.2) | 14072(42.5) | 40921(40.0) |
| **Employment situation** |  |  |  |  |  |  |
| **Employment or self-employed** | 19319(57.0) | 23139(63.8) | 48541(67.3) | 18239(58.5) | 19203(58.0) | 58135(56.8) |
| **Not in paid** | 14581(43.0) | 13132(36.2) | 23570(32.7) | 12914(41.5) | 13909(42.0) | 44128(43.2) |
| **Dietary changes** |  |  |  |  |  |  |
| **Never change.** | 12950(38.2) | 14077(38.8) | 28772(39.9) | 8839(28.4) | 9663(29.2) | 32771(32.0) |
| **Occasional or frequent change** | 20950(61.8) | 22194(61.2) | 43339(60.1) | 22314(71.6) | 23449(70.8) | 69492(68.0) |
| **Aspirin** |  |  |  |  |  |  |
| **No aspirin used** | 27255(80.4) | 30184(83.2) | 60827(84.4) | 27898(89.6) | 30033(90.7) | 93495(91.4) |
| **Aspirin use** | 6645(19.6) | 6087(16.8) | 11284(15.6) | 3255(10.4) | 3079(9.3) | 8768(8.6) |
| **Albumin g/L,Mean(SD)** | 44.56(2.63) | 45.31(2.40) | 46.25(2.44) | 43.81(2.59) | 44.46(2.4) | 45.53(2.46) |
| **Alkaline phosphatase U/L,Mean(SD)** | 88.71(30.22) | 82.37(21.23) | 77.47(18.92) | 90.79(36.74) | 86.35(25.97) | 81.29(22.67) |
| **Creatinine μmol/L,Mean(SD)** | 86.37(19.79) | 82.48(12.11) | 78.32(10.66) | 67.76(15.86) | 65.75(10.67) | 62.42(9.27) |
| **Glucose mmol/L,Mean(SD)** | 5.81(2.17) | 5.08(0.68) | 4.83(0.57) | 5.94(2.37) | 5.15(0.77) | 4.87(0.59) |
| **C-reactive protein mg/dL,Mean(SD)** | 4.25(6.63) | 2.38(3.32) | 1.41(1.88) | 4.92(6.84) | 3.13(4.14) | 1.7(2.38) |
| **Lymphocyte percentage,Mean(SD)** | 25.23(7.51) | 27.19(6.86) | 29.9(7.05) | 26.91(7.4) | 28.49(6.82) | 31.28(7) |
| **Mean cell volume fL,Mean(SD)** | 84.87(6.08) | 83.35(4.88) | 81.4(4.55) | 84.13(6.48) | 84.01(5.14) | 82.31(4.74) |
| **Red cell distribution width %,Mean(SD)** | 14.1(1.08) | 13.49(0.55) | 13.04(0.50) | 14.61(1.55) | 13.69(0.63) | 13.1(0.56) |
| **White blood cell count ×1000 cells/μL,Mean(SD)** | 7.85(2.63) | 7.04(1.64) | 6.29(1.41) | 7.79(2.3) | 7.21(1.7) | 6.39(1.46) |
| **PhenoAge acceleration,Mean(SD)** | 7.78(5.18) | 1.59(0.97) | -3.33(2.39) | 8.21(5.74) | 1.54(0.97) | -4.17(2.82) |

Data are presented as n, mean±SD or n (%), unless otherwise stated.PhenoAgeAccel: phenotypic age acceleration; BMI: body mass index.

# Supplementary Table S4. Baseline characteristics of 9 clinical chemistry biomarkers of Phenotypic Age in Chinese cohort

| **characteristics** | **Man** | | | **Woman** | | |
| --- | --- | --- | --- | --- | --- | --- |
| **Non-aging** | **Mild aging** | **Severe aging** | **Non-aging** | **Mild aging** | **Severe aging** |
| **Age, mean (SD), years** | 47.74(17.57) | 62.59(14.65) | 53.69(24.97) | 48.21(17.64) | 62.97(16.93) | 52.09(26.00) |
| **No of participants (%)** | 189102(59.1) | 65054(20.3) | 65777(20.6) | 213922(69.2) | 48044(15.5) | 47320(15.3) |
| **Albumin g/L,Mean(SD)** | 40.85(6.57) | 35.67(9.54) | 34.47(9.42) | 39.75(6.18) | 35.16(9.65) | 34.32(9.67) |
| **Alkaline phosphatase U/L,Mean(SD)** | 83.37(44.22) | 91.20(51.22) | 117.23(111.88) | 84.21(44.06) | 97.01(58.34) | 117.05(121.51) |
| **Creatinine μmol/L,Mean(SD)** | 71.32(17.31) | 80.56(25.93) | 96.6(81.88) | 54.45(13.37) | 63.64(23.83) | 78.59(80.46) |
| **Glucose mmol/L,Mean(SD)** | 5.20(1.05) | 5.92(1.85) | 6.69(3.66) | 5.13(0.98) | 5.97(1.87) | 6.47(3.58) |
| **C-reactive protein mg/L,Mean(SD)** | 12.72(26.72) | 31.53(46.00) | 43.82(60.33) | 11.5(24.73) | 30.08(43.78) | 37.33(56.16) |
| **Lymphocyte percentage,Mean(SD)** | 31.13(15.79) | 21.29(14.03) | 24.35(18.37) | 29.67(15.60) | 21.89(14.43) | 26.78(18.98) |
| **Mean cell volume fL,Mean(SD)** | 90.34(5.54) | 91.74(6.71) | 89.27(8.91) | 89.36(5.88) | 89.84(7.82) | 87.61(9.39) |
| **Red cell distribution width %,Mean(SD)** | 12.45(1.31) | 13.19(1.17) | 20.18(10.36) | 12.66(1.33) | 13.69(1.67) | 21.72(10.85) |
| **White blood cell count ×10^9 cells/μL,Mean(SD)** | 6.26(3.01) | 7.57(3.88) | 8.12(7.82) | 6.22(2.85) | 7.62(4.42) | 9.00(12.57) |
| **phenotypic ages,mean(SD)** | 43.18(16.64) | 67.41(10.66) | 88.91(16.33) | 42.67(16.36) | 67.57(12.15) | 90.26(17.36) |
| **phenoageaccel,mean(SD)** | -9.9(7.08) | 4.13(2.63) | 31.74(23.28) | -10.73(6.8) | 4.02(2.64) | 34.19(24.48) |

# Supplementary Table S5. PhenoAgeAccel of participants stratified by lifestyle factors in the UK Biobank.

|  | **PhenoAgeAccel median (IQR), years** | **PhenoAgeAccel median (IQR), years** |
| --- | --- | --- |
|  | **Males** | **Females** |
| BMI |  |  |
| ＜30 | -0.37(-3.22,2.87) | -1.99(-4.95,1.38) |
| ≥30 | 0.85(-2.04,4.16) | 0.58(-2.55,4.23) |
| Education |  |  |
| College | -0.63(-3.38,2.50) | -1.78(-4.82,1.65) |
| Non-college | 0(-2.88,3.28) | -1.30(-4.4,2.24) |
| sleep duration |  |  |
| ≤6h | 0.18(-2.75,3.51) | -1.28(-4.42,2.38) |
| ≥7h | -0.18(-3.03,3.09) | -1.48(-4.55,1.99) |
| Smoking status |  |  |
| Never smoking | -0.49(-3.24,2.6) | -1.61(-4.63,1.87) |
| Previous or current smoking | 0.38(-2.63,3.83) | -1.17(-4.32,2.45) |
| Employment situation |  |  |
| In paid employment or self-employed | -0.37(-3.16,2.77) | -1.35(-4.45,2.18) |
| Not in paid | 0.48(-2.56,3.99) | -1.54(-4.60,1.98) |
| Average income of households |  |  |
| >=31000 | -0.57(-3.30,2.52) | -1.68(-4.72,1.74) |
| <31000 | 0.49(-2.52,3.95) | -1.18(-4.31,2.45) |
| Aspirin |  |  |
| No aspirin used | -0.16(-3.01,3.08) | -1.47(-4.54,2.04) |
| Aspirin use | 0.37(-2.65,3.87) | -1.04(-4.22,2.71) |
| Dietary changes |  |  |
| never | -0.18(-3.06,3.10) | -1.73(-4.77,1.75) |
| Occasional or frequent change | -0.02(-2.88,3.26) | -1.30(-4.39,2.25) |

Data are presented as n, mean±SD or n (%), unless otherwise stated.

# Supplementary Table S6. Relationship between PhenoAgeAccel and risk of major diseases in Chinese corhort.

| **Man** | **Hazard ratio (95% CI)** | **p-value** | **Woman** | **Hazard ratio (95% CI)** | **p-value** |
| --- | --- | --- | --- | --- | --- |
| **HR per 1SD increase** | 1.15(1.15,1.16) | <0.001 | **HR per 1SD increase** | 1.12(1.11,1.12) | <0.001 |
| **Severe aging** | **Reference** |  | **Severe aging** | **Reference** |  |
| **Mild aging** | 0.85(0.84,0.86) | <0.001 | **Mild aging** | 0.85(0.83,0.86) | <0.001 |
| **Non-aging** | 0.58(0.58,0.59) | <0.001 | **Non-aging** | 0.66(0.65,0.66) | <0.001 |
| **Accelerated ageing** | **Reference** |  | **Accelerated ageing** | **Reference** |  |
| **Non-accelerated ageing** | 0.63(0.63,0.64) | <0.001 | **Non-accelerated ageing** | 0.71(0.70,0.72) | <0.001 |
| **PhenoAgeAccel (Quartiles)** |  |  | **PhenoAgeAccel (Quartiles)** |  |  |
| **Quartile 1** | **Reference** |  | **Quartile 1** | **Reference** |  |
| **Quartile 2** | 0.78(0.77,0.79) | <0.001 | **Quartile 2** | 0.80(0.79,0.81) | <0.001 |
| **Quartile 3** | 0.62(0.61,0.63) | <0.001 | **Quartile 3** | 0.68(0.67,0.69) | <0.001 |
| **Quartile 4** | 0.50(0.49,0.51) | <0.001 | **Quartile 4** | 0.63(0.62,0.64) | <0.001 |
| **PhenoAgeAccel (Tertiles)** |  |  | **PhenoAgeAccel (Tertiles)** |  |  |
| **Tertile 1** | **Reference** |  | **Tertile 1** | **Reference** |  |
| **Tertile 2** | 0.54(0.53,0.54) | <0.001 | **Tertile 2** | 0.76(0.75,0.77) | <0.001 |
| **Tertile 3** | 0.72(0.72,0.73) | <0.001 | **Tertile 3** | 0.66(0.65,0.67) | <0.001 |

# Supplementary Table S7. Fine and Gray competing risk model in the UK Biobank cohort

|  | **Man** | | **Woman** | |
| --- | --- | --- | --- | --- |
|  | **HR(95%CI)** | **P value** | **HR(95%CI)** | **P value** |
| Model 1 |  |  |  |  |
| Severe aging | Reference |  | Reference |  |
| Mild aging | 0.78(0.76,0.79) | <0.001 | 0.83(0.81,0.85) | <0.001 |
| Non-aging | 0.67(0.65,0.68) | <0.001 | 0.71(0.70,0.73) | <0.001 |
| Model 2 |  |  |  |  |
| Severe aging | Reference |  | Reference |  |
| Mild aging | 0.82(0.80,0.84) | <0.001 | 0.85(0.83,0.88) | <0.001 |
| Non-aging | 0.75(0.73,0.76) | <0.001 | 0.76(0.75,0.78) | <0.001 |
| Model 3 |  |  |  |  |
| Severe aging | Reference |  | Reference |  |
| Mild aging | 0.84(0.82,0.85) | <0.001 | 0.86(0.83,0.88) | <0.001 |
| Non-aging | 0.76(0.75,0.78) | <0.001 | 0.77(0.76,0.79) | <0.001 |

# Supplementary Table S8. Mediation effect of phenotypic age acceleration (PhenoAgeAccel) on the associations between lifestyle aspects ,across social classes,BMI and aspirin useand major diseases

| **variants** | **Direct association β(95% CI)** | **p-value** | **Indirect association β (95% CI)** | **p-value** | **Mediation proportion % (95% CI)** | **p-value** |
| --- | --- | --- | --- | --- | --- | --- |
| short sleep duration(≤6h) | 0.0025(0.0021,0.0029) | <0.001 | 0.0251(0.0211,0.0293) | <0.001 | 8.91(7.18,10.88) | <0.001 |
| high BMI(≥30kg/m2) | 0.0134(0.0127,0.0141) | <0.001 | 0.1001(0.0960,0.1042) | <0.001 | 11.79(11.14,12.52) | <0.001 |
| Occasional or frequent dietary changes | 0.0014(0.0011,0.0017) | <0.001 | 0.0155(0.0122,0.0188) | <0.001 | 8.36(6.16,11.19) | <0.001 |
| lower edcation level(Non-college degree） | 0.0050(0.0046,0.0054) | <0.001 | 0.0722(0.0686,0.0757) | <0.001 | 6.49(5.94,7.05) | <0.001 |
| lower average household income(＜31000£) | 0.0049(0.0046,0.0053) | <0.001 | 0.0899(0.0866,0.0932) | <0.001 | 5.18(4.79,5.60) | <0.001 |
| Previous or current smoking | 0.0057(0.0053,0.0061) | <0.001 | 0.0809(0.0778,0.0843) | <0.001 | 6.56(6.09,7.03) | <0.001 |
| employment status(Not in paid) | 0.0019(0.0016,0.0022) | <0.001 | 0.1484(0.1452,0.1517) | <0.001 | 1.24(1.04,1.46) | <0.001 |
| aspirin use | 0.0061(0.0056,0.0066) | <0.001 | 0.1567(0.1513,0.1618) | <0.001 | 3.74(3.41,4.07) | <0.001 |

# Supplementary Table S9. The estimates of disease-free years gained at age 45 and 65, and multivariable Cox regression after excluding participants with anxiety or/and depression in the UK Biobank

|  | **UKB** | |
| --- | --- | --- |
|  | **Man** | **Woman** |
| **Events/Case** |  |  |
| **Severe aging** | 13378/30953 | 9133/27099 |
| **Mild aging** | 12135/33776 | 8595/29408 |
| **Non-aging** | 21681/67875 | 24205/92579 |
| **Diagnostic rate (95% CI) per1000 person-years** |  |  |
| **Severe aging** | 37.86(37.24,38.50) | 27.32(26.77,27.88) |
| **Mild aging** | 29.26(28.76,29.78) | 22.80(22.32,23.28) |
| **Non-aging** | 25.18(24.85,25.51) | 19.85(19.61,20.10) |
| **HR (95% CI)** |  |  |
| **Severe aging** | Reference | Reference |
| **Mild aging** | 0.83(0.81,0.85) | 0.86(0.83,0.88) |
| **Non-aging** | 0.76(0.74,0.77) | 0.77(0.76,0.79) |
| **The estimate of disease-free years at age 45 (95% CI)** |  |  |
| **Severe aging** | 26.94(26.62,27.26) | 29.07(28.73,29.41) |
| **Mild aging** | 29.65(29.33,29.97) | 31.74(31.41,32.08) |
| **Non-aging** | 30.81(30.54,31.08) | 33.50(33.26,33.74) |
| **Disease-free Years gain at age 45 (95% CI)** |  |  |
| **Severe aging** | Reference | Reference |
| **Mild aging** | 2.71(2.26,3.16) | 2.67(2.20,3.15) |
| **Non-aging** | 3.87(3.45,4.28) | 4.43(4.01,4.84) |
| **The estimate of disease-free years at age 65 (95% CI)** |  |  |
| **Severe aging** | 16.69(16.44,16.94) | 19.74(19.48,20.00) |
| **Mild aging** | 18.55(18.31,18.80) | 21.43(21.19,21.68) |
| **Non-aging** | 19.34(19.13,19.56) | 22.53(22.34,22.72) |
| **Disease-free Years gain at age 65 (95% CI)** |  |  |
| **Severe aging** | Reference | Reference |
| **Mild aging** | 1.86(1.51,2.21) | 1.69(1.33,2.05) |
| **Non-aging** | 2.65(2.32,2.98) | 2.79(2.46,3.11) |

# Supplementary Table S10. relationship between biological ageing and risk of morbidity and disease-free years at 45 and 65 age excluding Participants with Onset of Disease within 2 Years of Baseline .

|  | **Man** | **Woman** |
| --- | --- | --- |
| **Event/Case** |  |  |
| **Severe aging** | 13180/31594 | 9862/29409 |
| **Mild aging** | 12026/34537 | 9280/31720 |
| **Non-ageing** | 21434/69269 | 25730/98778 |
| **Diagnostic rate (95% CI) per1000 person-years** |  |  |
| **Severe aging** | 34.87(34.29,35.46) | 26.44(25.93,26.96) |
| **Mild aging** | 27.48(27.00,27.97) | 22.37(21.92,22.82) |
| **Non-ageing** | 23.76(23.45,24.08) | 19.45(19.21,19.68) |
| **HR (95% CI)** |  |  |
| **Severe aging** | Reference | Reference |
| **Mild aging** | 0.84(0.82,0.85) | 0.85(0.83,0.87) |
| **Non-aging** | 0.78(0.77,0.80) | 0.78(0.77,0.80) |
| **The estimate of disease-free years at age 45 (95% CI)** |  |  |
| **Severe aging** | 28.89(28.58,29.19) | 31.01(30.67,31.35) |
| **Mild aging** | 31.29(30.98,31.60) | 33.54(33.20,33.87) |
| **Non-aging** | 32.33(32.07,32.60) | 35.23(34.99,35.48) |
| **Disease-free Years gain at age 45 (95% CI)** |  |  |
| **Severe aging** | Reference | Reference |
| **Mild aging** | 2.40(1.97,2.84) | 2.53(2.05,3.01) |
| **Non-aging** | 3.45(3.05,3.85) | 4.22(3.80,4.65) |
| **The estimate of disease-free years at age 65 (95% CI)** |  |  |
| **Severe aging** | 16.56(16.31,16.81) | 19.35(19.07,19.62) |
| **Mild aging** | 18.29(18.04,18.55) | 21.07(20.80,21.33) |
| **Non-aging** | 19.05(18.82,19.27) | 22.21(22.01,22.41) |
| **Disease-free Years at age 45(95%CI)** |  |  |
| **Severe aging** | Reference | Reference |
| **Mild aging** | 1.73(1.38,2.09) | 1.72(1.34,2.10) |
| **Non-aging** | 2.49(2.15,2.82) | 2.86(2.52,3.20) |

# Supplementary Table S11. relationship between biological ageing and risk of major diseases and disease-free years at 45 and 65 age after restricting the analysis to participants with complete covariates.

|  | **Man** | **Woman** |
| --- | --- | --- |
| **NCase/NTotal** |  |  |
| **Severe aging** | 15093/33279 | 15093/33279 |
| **Mild aging** | 13613/35965 | 13613/35965 |
| **Non-ageing** | 26838/79127 | 26838/79127 |
| **Diagnostic rate (95% CI) per1000 person-years** |  |  |
| **Severe aging** | 40.52(39.89,41.15) | 30.97(30.41,31.54) |
| **Mild aging** | 31.33(30.82,31.86) | 25.69(25.21,26.19) |
| **Non-ageing** | 27.14(26.82,27.46) | 22.19(21.95,22.43) |
| **HR (95% CI)** |  |  |
| **Severe aging** | Reference | Reference |
| **Mild aging** | 0.83(0.81,0.85) | 0.86(0.83,0.88) |
| **Non-aging** | 0.76(0.75,0.78) | 0.77(0.76,0.79) |
| **The estimate of disease-free years at age 45 (95% CI)** |  |  |
| **Severe aging** | 26.75(26.44,27.06) | 28.90(28.55,29.26) |
| **Mild aging** | 29.47(29.17,29.78) | 31.60(31.26,31.95) |
| **Non-aging** | 30.62(30.37,30.88) | 33.38(33.12,33.63) |
| **Disease-free Years gain at age 45 (95% CI)** |  |  |
| **Severe aging** | Reference | Reference |
| **Mild aging** | 2.51(2.00,3.02) | 2.28(1.71,2.85) |
| **Non-aging** | 3.60(3.13,4.07) | 3.88(3.38,4.38) |
| **The estimate of disease-free years at age 65 (95% CI)** |  |  |
| **Severe aging** | 16.66(16.42,16.90) | 19.69(19.42,19.96) |
| **Mild aging** | 18.53(18.29,18.77) | 21.40(21.15,21.65) |
| **Non-aging** | 19.31(19.10,19.52) | 22.50(22.31,22.70) |
| **Disease-free Years at age 65(95%CI)** |  |  |
| **Severe aging** | Reference | Reference |
| **Mild aging** | 1.73(1.31,2.14) | 1.43(0.98,1.88) |
| **Non-aging** | 2.47(2.08,2.86) | 2.41(2.01,2.82) |

# Supplementary Table S12. Relationship between biological ageing and risk of major diseases and disease-free years at 45 excluding single disease

|  | **UK Bioank** | | **Chinese cohort** | |
| --- | --- | --- | --- | --- |
|  | **Hazard ratio (95% CI)** | **p-value** | **Hazard ratio (95% CI)** | **p-value** |
| **Man** |  |  |  |  |
| **Major diseaseswithout Dementia** |  |  |  |  |
| **Severe aging** | Reference |  | Reference |  |
| **Mild aging** | 0.83(0.81,0.85) | <0.001 | 0.84(0.83,0.86) | <0.001 |
| **Non-aging** | 0.75(0.74,0.77) | <0.001 | 0.58(0.57,0.59) | <0.001 |
| **Major diseaseswithout Cancer** |  |  |  |  |
| **Severe aging** | Reference |  | Reference |  |
| **Mild aging** | 0.79(0.76,0.81) | <0.001 | 0.81(0.80,0.82) | <0.001 |
| **Non-aging** | 0.70(0.68,0.72) | <0.001 | 0.56(0.55,0.56) | <0.001 |
| **Major diseaseswithout Respiratory diseases** |  |  |  |  |
| **Severe aging** | Reference |  | Reference |  |
| **Mild aging** | 0.91(0.88,0.95) | <0.001 | 0.62(0.6,0.64) | <0.001 |
| **Non-aging** | 0.91(0.88,0.94) | <0.001 | 0.59(0.57,0.6) | <0.001 |
| **Major diseaseswithout Diabetes** |  |  |  |  |
| **Severe aging** | Reference |  | Reference |  |
| **Mild aging** | 0.82(0.80,0.84) | <0.001 | 0.84(0.83,0.85) | <0.001 |
| **Non-aging** | 0.73(0.71,0.75) | <0.001 | 0.60(0.59,0.61) | <0.001 |
| **Woman** |  |  |  |  |
| **Major diseaseswithout Dementia** |  |  |  |  |
| **Severe aging** | Reference |  | Reference |  |
| **Mild aging** | 0.85(0.83,0.88) | <0.001 | 0.85(0.83,0.86) | <0.001 |
| **Non-aging** | 0.77(0.75,0.78) | <0.001 | 0.65(0.64,0.66) | <0.001 |
| **Major diseaseswithout Cancer** |  |  |  |  |
| **Severe aging** | Reference |  | Reference |  |
| **Mild aging** | 0.80(0.77,0.82) | <0.001 | 0.81(0.80,0.83) | <0.001 |
| **Non-aging** | 0.69(0.67,0.71) | <0.001 | 0.62(0.61,0.63) | <0.001 |
| **Major diseaseswithout Respiratory diseases** |  |  |  |  |
| **Severe aging** | Reference |  | Reference |  |
| **Mild aging** | 0.95(0.91,0.99) | <0.001 | 0.63(0.61,0.64) | <0.001 |
| **Non-aging** | 0.93(0.90,0.96) | <0.001 | 0.61(0.60,0.62) | <0.001 |
| **Major diseaseswithout Diabetes** |  |  |  |  |
| **Severe aging** | Reference |  | Reference |  |
| **Mild aging** | 0.87(0.85,0.90) | <0.001 | 0.82(0.80,0.84) | <0.001 |
| **Non-aging** | 0.79(0.77,0.81) | <0.001 | 0.67(0.66,0.68) | <0.001 |

# Supplementary Table S13. relationship between biological ageing and risk of major diseases and disease-free years at 45 and 65 age after filling in missing values for biomarks.

|  | **Man** | **Woman** |
| --- | --- | --- |
| **NCase/NTotal** |  |  |
| **Severe aging** | 15093/33279 | 11404/30657 |
| **Mild aging** | 13613/35965 | 10484/32534 |
| **Non-ageing** | 26838/79127 | 31940/111284 |
| **Diagnostic rate (95% CI) per1000 person-years** |  |  |
| **Severe aging** | 40.52((39.89,41.15)) | 30.97((30.41,31.54)) |
| **Mild aging** | 31.33((30.82,31.86)) | 25.69((25.21,26.19)) |
| **Non-ageing** | 27.14((26.82,27.46)) | 22.19((21.95,22.43)) |
| **HR (95% CI)** |  |  |
| **Severe aging** | Reference | Reference |
| **Mild aging** | 0.83(0.81,0.85) | 0.86(0.83,0.88) |
| **Non-aging** | 0.76(0.75,0.78) | 0.77(0.76,0.79) |
| **The estimate of disease-free years at age 45 (95% CI)** |  |  |
| **Severe aging** | 26.75(26.44,27.06) | 28.90(28.55,29.26) |
| **Mild aging** | 29.47(29.17,29.78) | 31.60(31.26,31.95) |
| **Non-aging** | 30.62(30.37,30.88) | 33.38(33.12,33.63) |
| **Disease-free Years gain at age 45 (95% CI)** |  |  |
| **Severe aging** | Reference | Reference |
| **Mild aging** | 2.72(2.29,3.16) | 2.70(2.20,3.20) |
| **Non-aging** | 3.87(3.47,4.27) | 4.47(4.03,4.91) |
| **The estimate of disease-free years at age 65 (95% CI)** |  |  |
| **Severe aging** | 16.66(16.42,16.90) | 19.69(19.42,19.96) |
| **Mild aging** | 18.53(18.29,18.77) | 21.40(21.15,21.65) |
| **Non-aging** | 19.31(19.10,19.52) | 22.50(22.31,22.70) |
| **Disease-free Years at age 65(95%CI)** |  |  |
| **Severe aging** | Reference | Reference |
| **Mild aging** | 1.87(1.53,2.21) | 1.71(1.34,2.08) |
| **Non-aging** | 2.65(2.33,2.97) | 2.81(2.48,3.14) |

# Supplementary Table S14. Baseline characteristics of 9 clinical chemistry biomarkers of Phenotypic Age in Northern and Southern China Cohort

| **characteristics** | **Northern China Cohort** | | | | | | **Southern China Cohort** | | | | | |
| --- | --- | --- | --- | --- | --- | --- | --- | --- | --- | --- | --- | --- |
| **Man** | | | **Woman** | | | **Man** | | | **Woman** | | |
| **Non-aging** | **Mild aging** | **Severe aging** | **Non-aging** | **Mild aging** | **Severe aging** | **Non-aging** | **Mild aging** | **Severe aging** | **Non-aging** | **Mild aging** | **Severe aging** |
| **Age, mean (SD), years** | 50.17(16.84) | 65.13(14.69) | 37.98(27.75) | 48.4(17.63) | 64.29(18.28) | 39.13(27.42) | 52.50(18.68) | 53.54(19.36) | 55.38(18.85) | 53.82(17.8) | 52.67(20.11) | 53.62(20.27) |
| **No of participants (%)** | 111238(66.8) | 27938(16.8) | 27276(16.4) | 130370(73.8) | 22839(12.9) | 23499(13.3) | 83806(0.54) | 34780(0.23) | 34895(0.23) | 89188(0.68) | 21752(0.16) | 21638(0.16) |
| **Albumin g/L,Mean(SD)** | 39.81(7.52) | 30.6(12.65) | 34.04(11.96) | 38.55(6.89) | 30.59(12.4) | 33.92(11.57) | 41.73(4.48) | 39.09(5.54) | 35.62(6.51) | 41.39(4.22) | 38.44(5.32) | 35.48(6.28) |
| **Alkaline phosphatase U/L,Mean(SD)** | 74.62(32.35) | 80.9(41.48) | 101.93(65.06) | 80.16(40.17) | 88.09(47.74) | 95.68(63.05) | 90.67(42.66) | 106.29(65.96) | 136.79(143.54) | 88.84(42.28) | 109.59(73.97) | 147.67(165.63) |
| **Creatinine μmol/L,Mean(SD)** | 69.52(16.56) | 76.82(29.31) | 66.00(41.52) | 52.29(12.72) | 60.21(26.04) | 54.34(37.01) | 75.94(18.00) | 83.12(25.95) | 118.84(100.07) | 59.65(14.64) | 65.5(24.51) | 102.17(106.81) |
| **Glucose mmol/L,Mean(SD)** | 5.17(1.1) | 5.88(2.14) | 5.5(3.29) | 5.03(0.97) | 5.78(2.01) | 5.39(3.13) | 5.26(0.97) | 6.04(1.66) | 7.71(3.79) | 5.34(1.03) | 6.23(1.90) | 7.51(3.82) |
| **C-reactive protein mg/L,Mean(SD)** | 11.84(25.12) | 31.12(43.95) | 24.56(42.36) | 10.3(21.9) | 27.75(41.17) | 20.89(38.56) | 13.24(27.25) | 37.1(48.86) | 59.68(69.65) | 13.35(27.55) | 37.49(49.35) | 55.41(67.43) |
| **Lymphocyte percentage,Mean(SD)** | 33.73(18.11) | 22.84(18.72) | 36.19(20.1) | 30.49(18) | 23.11(18.37) | 36.82(19.59) | 27.14(10.28) | 19.46(10.04) | 15.65(10.70) | 28.14(10.50) | 19.68(10.56) | 16.65(11.40) |
| **Mean cell volume fL,Mean(SD)** | 90.27(5.22) | 91.09(6.34) | 85.68(7.9) | 89(5.65) | 88.91(7.66) | 85.03(8.4) | 91.22(5.78) | 91.24(7.27) | 91.17(9.15) | 90.48(5.94) | 89.48(8.04) | 89.21(10.49) |
| **Red cell distribution width %,Mean(SD)** | 12.31(1.41) | 13.08(1.25) | 28.45(11.6) | 12.56(1.38) | 13.72(1.89) | 28.65(11.58) | 12.67(1.07) | 13.32(1.14) | 14.43(2.37) | 12.8(1.13) | 13.78(1.48) | 15.2(2.85) |
| **White blood cell count ×10^9 cells/μL,Mean(SD)** | 5.69(3.09) | 6.67(4.14) | 5.76(9.17) | 6.02(3.02) | 7.29(5.37) | 8.27(16.53) | 6.67(2.15) | 8.65(3.43) | 10.76(6.45) | 6.35(2.20) | 8.48(3.69) | 10.44(6.76) |
| **phenotypic ages,mean(SD)** | 43.96(16.36) | 69.49(10.82) | 94.38(17.33) | -11.55(6.92) | 4.43(3.06) | 48.51(25.86) | 49.86(19.88) | 60.43(20.41) | 77.76(22.37) | 49.46(18.90) | 59.5(21.15) | 76.03(23.76) |
| **phenoageaccel,mean(SD)** | -10.79(7.36) | 4.47(3.03) | 48.01(26.02) | 41.98(16.21) | 68.89(13.21) | 95.67(17.74) | -6.25(4.5) | 3.24(2.07) | 18.64(11.81) | -8.02(4.92) | 3.22(2.06) | 18.75(12.00) |

# Supplementary Table S15. Relationship between biological ageing and risk of major diseases The estimates of disease-free years gained at age 45 and 65 years in Northern and Southern China Cohort

|  | **Northern China Cohort** | | **Southern China Cohort** | |
| --- | --- | --- | --- | --- |
|  | **Hazard ratio (95% CI)** | **p-value** | **Hazard ratio (95% CI)** | **p-value** |
| **Man** |  |  |  |  |
| **HR per 1SD increase** | 1.10(1.09,1.10) | <0.001 | 1.21(1.2,1.22) | <0.001 |
| **Severe aging** | Reference |  | Reference |  |
| **Mild aging** | 1.10(1.07,1.12) | <0.001 | 0.76(0.74,0.77) | <0.001 |
| **Non-aging** | 0.67(0.66,0.68) | <0.001 | 0.59(0.58,0.60) | <0.001 |
| **Accelerated ageing** | Reference |  | Reference |  |
| **Non-accelerated ageing** | 0.64(0.63,0.65) | <0.001 | 0.68(0.67,0.69) | <0.001 |
| **PhenoAgeAccel (Quartiles)** |  |  |  |  |
| **Quartile 1** | Reference |  | Reference |  |
| **Quartile 2** | 0.82(0.81,0.84) | <0.001 | 0.73(0.72,0.75) | <0.001 |
| **Quartile 3** | 0.62(0.61,0.63) | <0.001 | 0.63(0.62,0.64) | <0.001 |
| **Quartile 4** | 0.51(0.50,0.52) | <0.001 | 0.57(0.56,0.58) | <0.001 |
| **PhenoAgeAccel (Tertiles)** |  |  |  |  |
| **Tertile 1** | Reference |  | Reference |  |
| **Tertile 2** | 0.73(0.72,0.74) | <0.001 | 0.71(0.7,0.73) | <0.001 |
| **Tertile 3** | 0.54(0.53,0.54) | <0.001 | 0.61(0.60,0.62) | <0.001 |
| **Woman** |  |  |  |  |
| **HR per 1SD increase** | 1.08(1.07,1.08) | <0.001 | 1.16(1.15,1.17) | <0.001 |
| **Severe aging** | Reference |  | Reference |  |
| **Mild aging** | 1.08(1.06,1.11) | <0.001 | 0.77(0.75,0.80) | <0.001 |
| **Non-aging** | 0.73(0.72,0.74) | <0.001 | 0.66(0.64,0.67) | <0.001 |
| **Accelerated ageing** | Reference |  | Reference |  |
| **Non-accelerated ageing** | 0.70(0.69,0.71) | <0.001 | 0.74(0.73,0.76) | <0.001 |
| **PhenoAgeAccel (Quartiles)** |  |  |  |  |
| **Quartile 1** | Reference |  | Reference |  |
| **Quartile 2** | 0.86(0.84,0.87) | <0.001 | 0.78(0.76,0.80) | <0.001 |
| **Quartile 3** | 0.69(0.68,0.70) | <0.001 | 0.69(0.67,0.71) | <0.001 |
| **Quartile 4** | 0.63(0.62,0.64) | <0.001 | 0.67(0.65,0.68) | <0.001 |
| **PhenoAgeAccel (Tertiles)** |  |  |  |  |
| **Tertile 1** | Reference |  | Reference |  |
| **Tertile 2** | 0.77(0.76,0.78) | <0.001 | 0.76(0.75,0.78) | <0.001 |
| **Tertile 3** | 0.65(0.64,0.65) | <0.001 | 0.70(0.68,0.71) | <0.001 |
